# Supplementary material for: A Wnt-mediated transformation of the bone marrow stromal cell identity orchestrates skeletal regeneration
Source: PubMed Central journal article supplement (PMC6965122; doi:10.1038/s41467-019-14029-w), 2020-01-16
Supplement: 41467_2019_14029_MOESM1_ESM.pdf [file 41467_2019_14029_MOESM1_ESM.pdf]

## **Supplementary Information**

A Wnt-mediated transformation of the bone marrow stromal cell  
identity orchestrates skeletal regeneration

Matsushita et al.



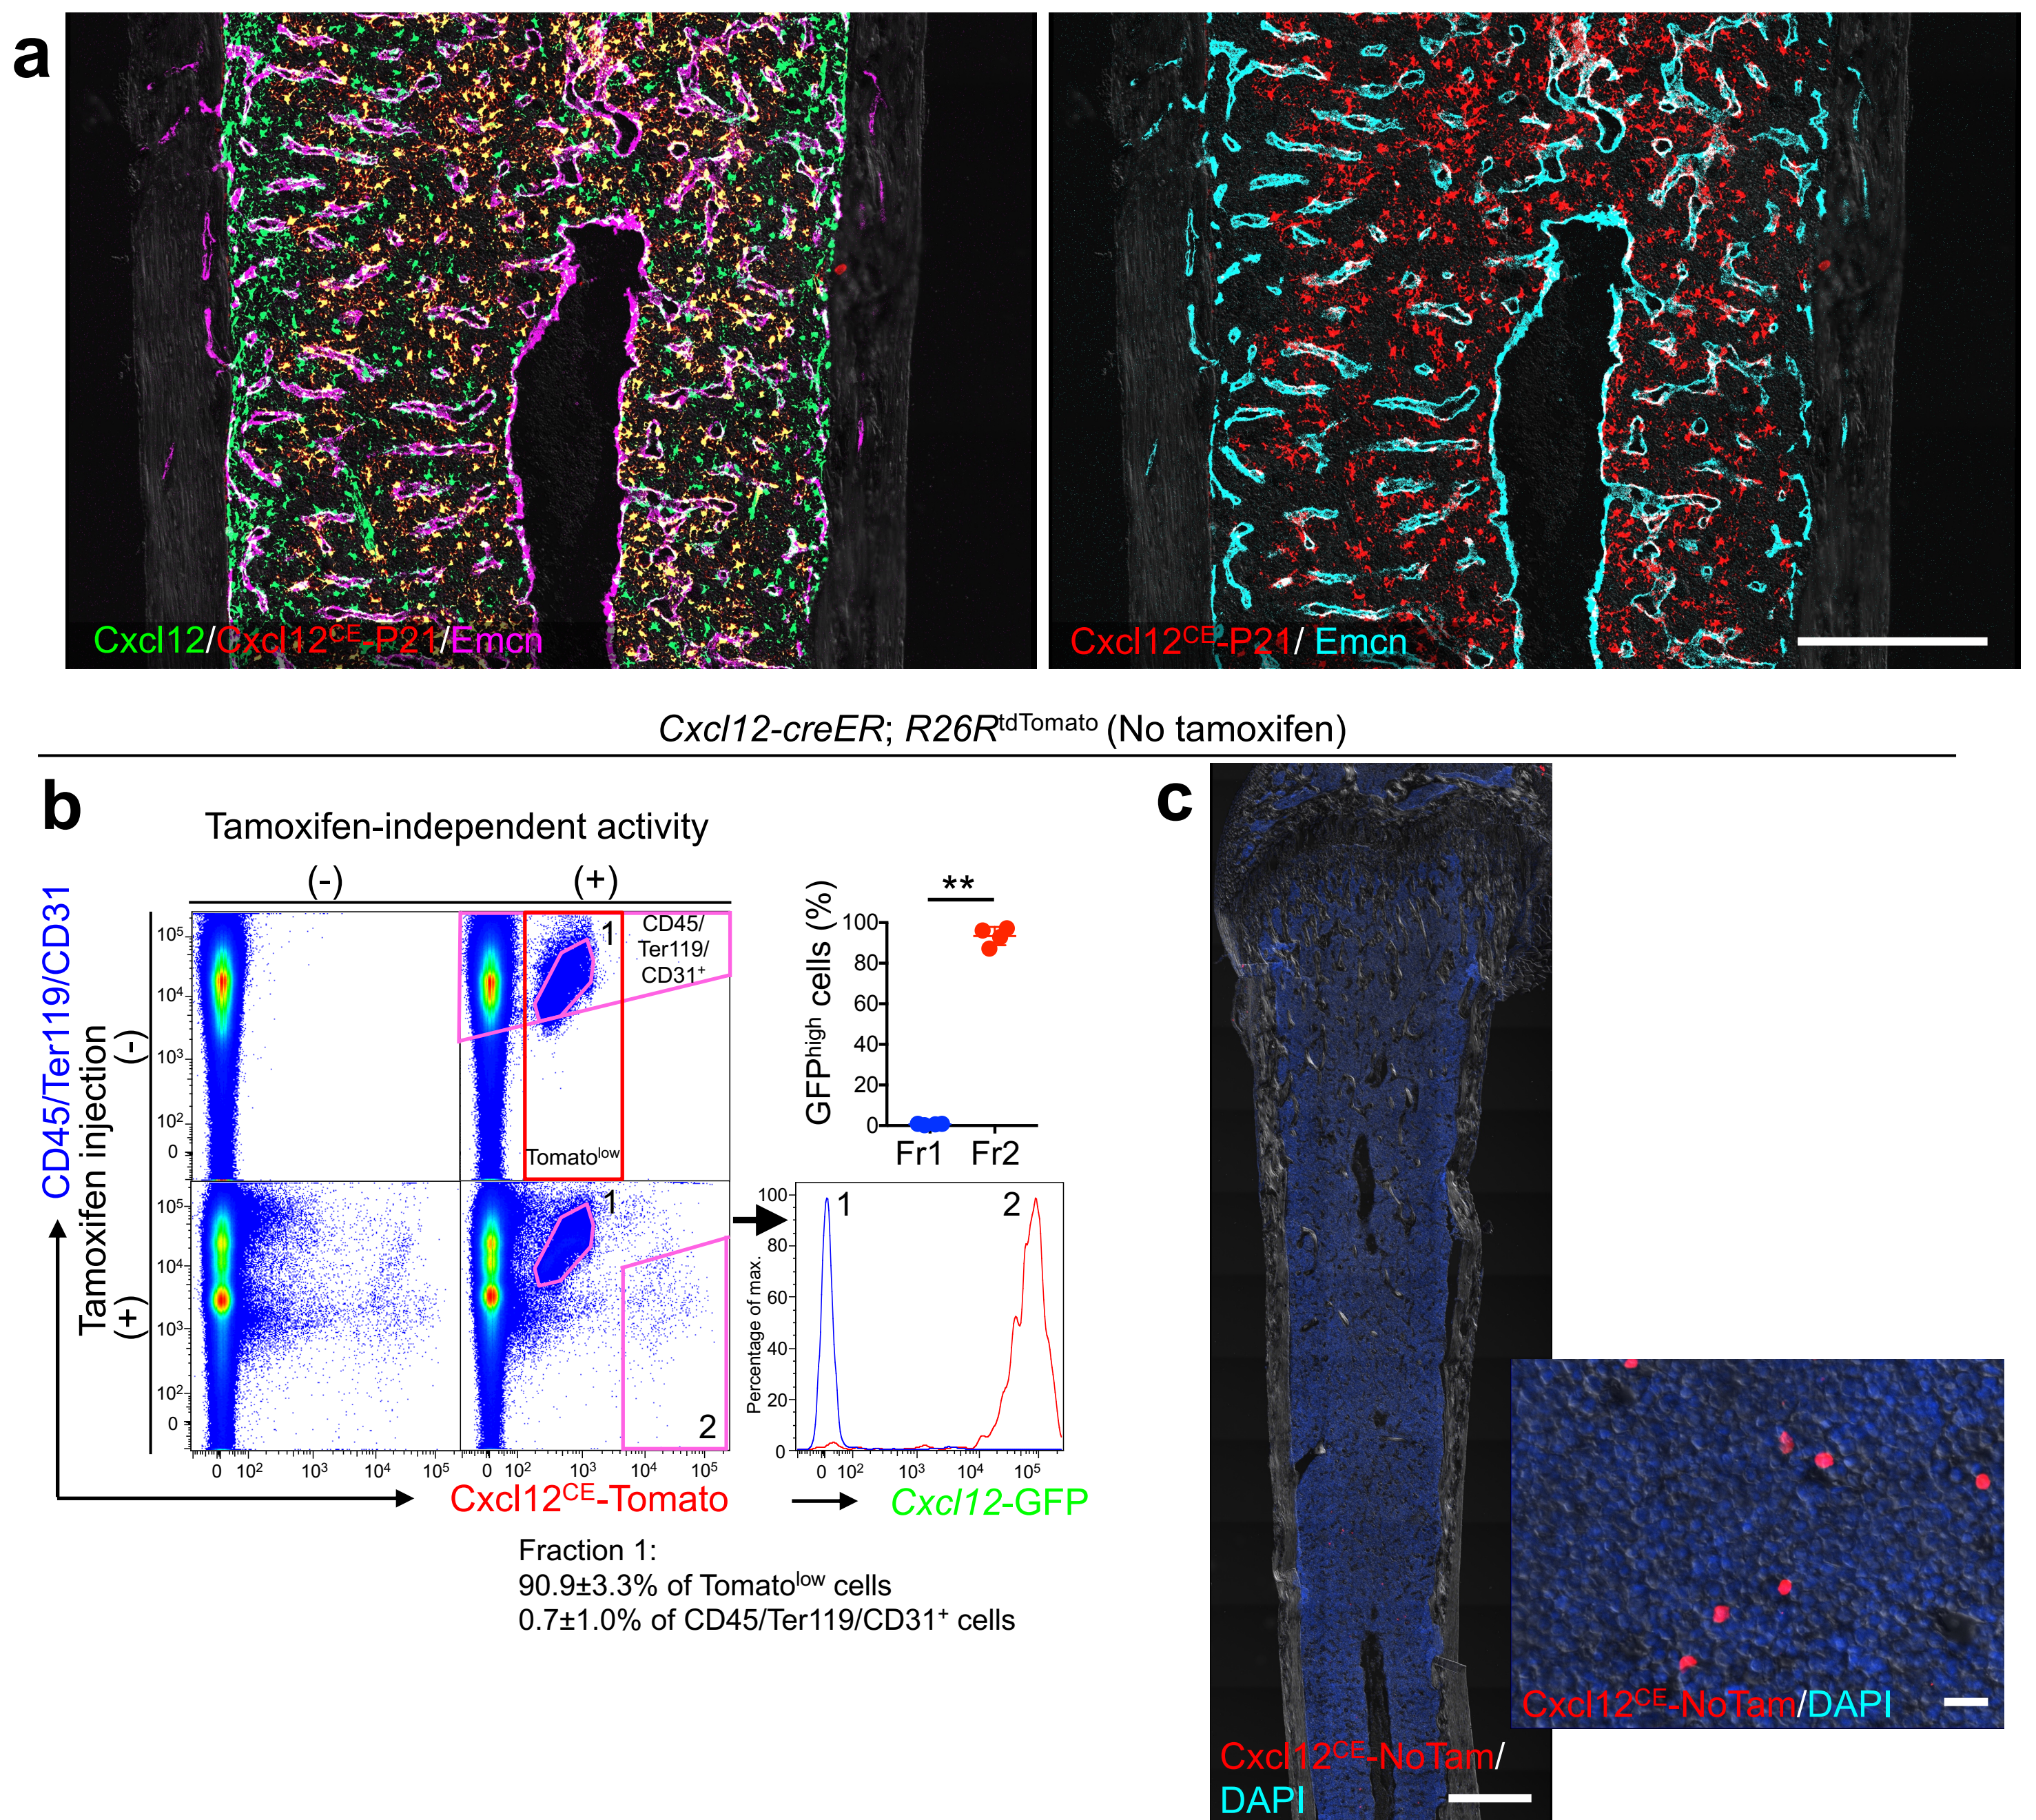

### Supplementary Figure 1. Characterization of *Cxcl12-creER* line

**(a)** Short-chase analysis of *Cxcl12-creER*<sup>+</sup> cells. *Cxcl12*<sup>GFP/+</sup>; *Cxcl12-creER*; *R26R*<sup>tdTomato</sup> (pulsed at P21) distal femurs. Emcn staining. Grey: DIC. Scale bar: 500μm. *n*=5 mice.

**(b,c)** Tamoxifen-negative control of *Cxcl12-creER*; *R26R*<sup>tdTomato</sup> mice at P28. **(b)**: Flow cytometry analysis of FSC/SSC-gated bone marrow cells. Left panels: representative plots of cells from mice without tamoxifen-independent recombination, right panels: those from mice with some tamoxifen-independent activities. Upper panels: without tamoxifen, lower panels: with tamoxifen injection at P21. Fraction 1: CD45/Ter119/CD31<sup>+</sup>tdTomato<sup>low</sup> tamoxifen-independently induced hematopoietic population. Fraction 2: CD45/Ter119/CD31<sup>neg</sup>tdTomato<sup>high</sup> tamoxifen-induced mesenchymal population. Upper right panel: percentage of *Cxcl12*-GFP<sup>high</sup> cells among Fraction 1 and Fraction 2. *n*=4 mice. \*\**p*<0.01, two-tailed, Mann-Whitney's *U*-test. Data are presented as mean ± s.d. **(c)**: Distal femur bone marrow with growth plates on top. Right panel: central marrow space. Gray: DIC. Scale bar: 500μm (left), 20μm (right). *n*=4 mice. Source data are provided as a Source Data file.



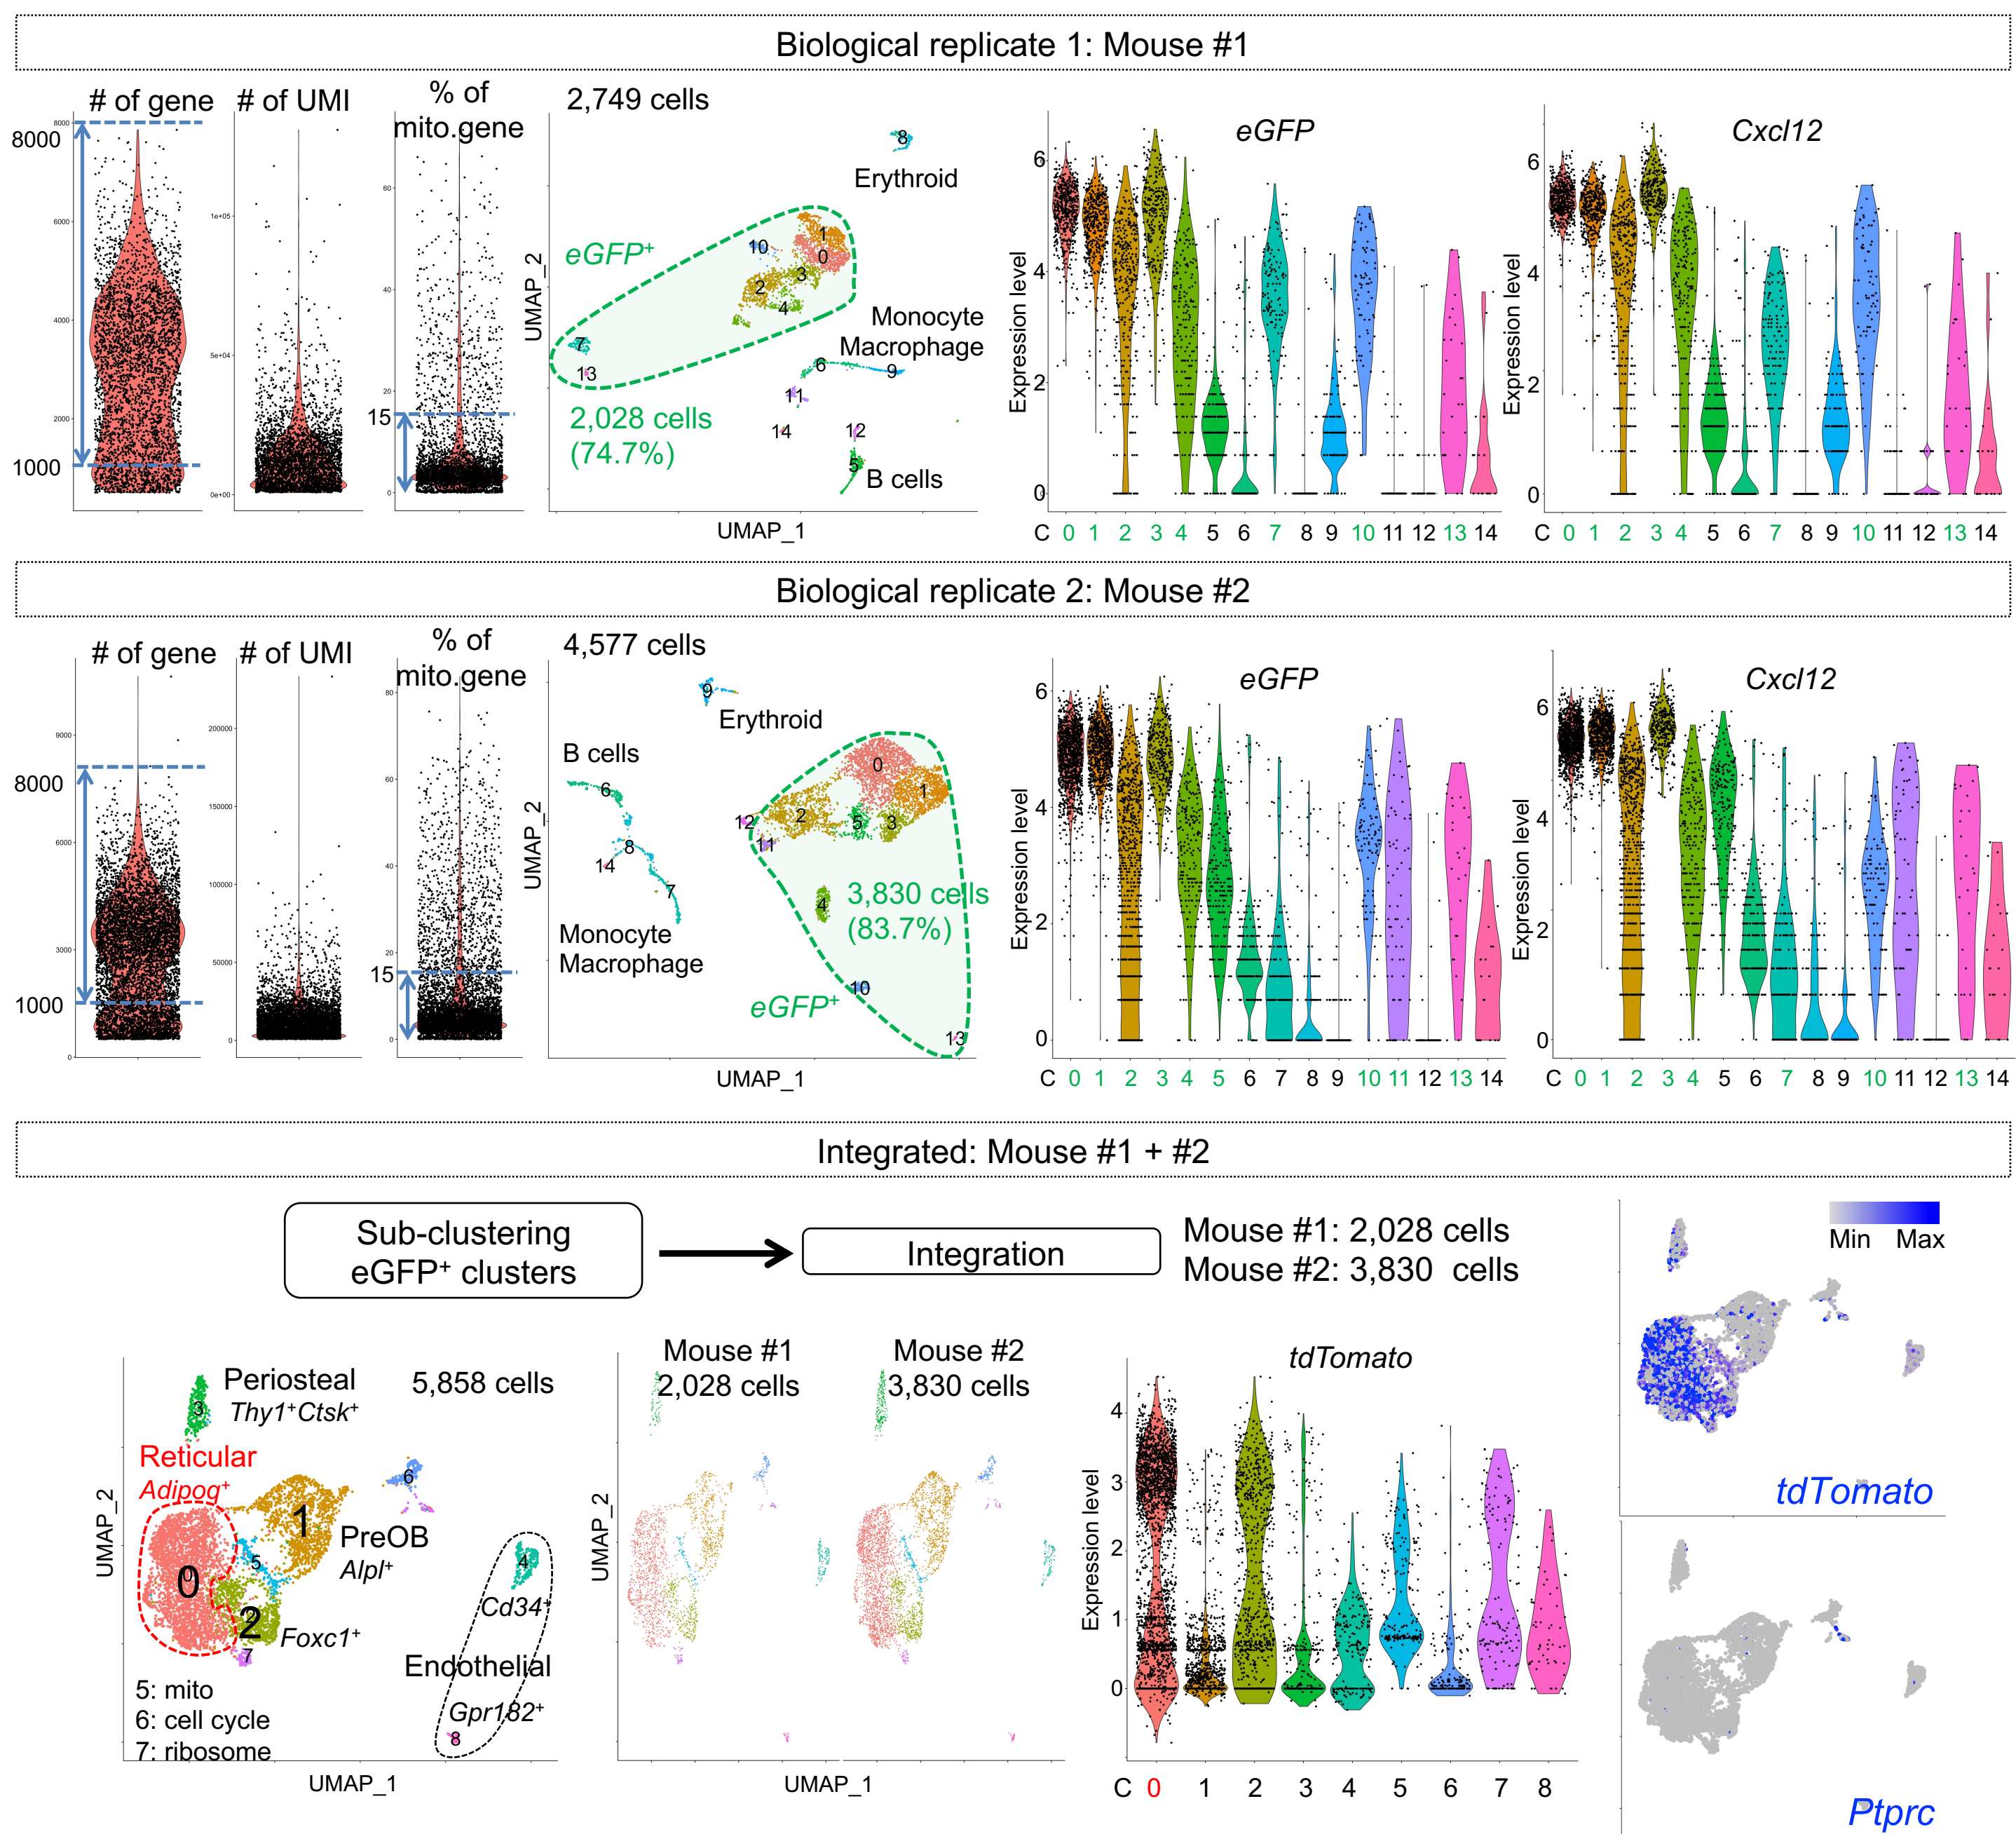

## Supplementary Figure 2. Single cell RNA-seq analysis of *Cxcl12-creER*<sup>+</sup> BMSCs

Single cell RNA-seq analysis of fluorescently sorted single cells gated on a GFP<sup>high</sup> fraction harvested from *Cxcl12*<sup>GFP/+</sup>; *Cxcl12-creER*; *R26R*<sup>tdTomato</sup> femur bone marrow at P28 (pulsed at P21). Upper panels: Biological replicate 1 (Mouse #1, *n*=2,749 cells), middle panels: Biological replicate 2 (Mouse #2, *n*=4,577 cells), bottom panels: integrated data of the two biological replicates. Leftmost panels: QC plots, left center panels: UMAP-based visualization of major classes of FACS-sorted cells, right center panels: violin plots, right panels: feature plots. Green dotted contours: *eGFP*<sup>+</sup> clusters. Lower right center panel: *tdTomato* expression in each cluster in the integrated space. *n*=5,858 cells merged from two biological replicates (Mouse #1: 2,028 cells, Mouse #2: 3,830 cells).



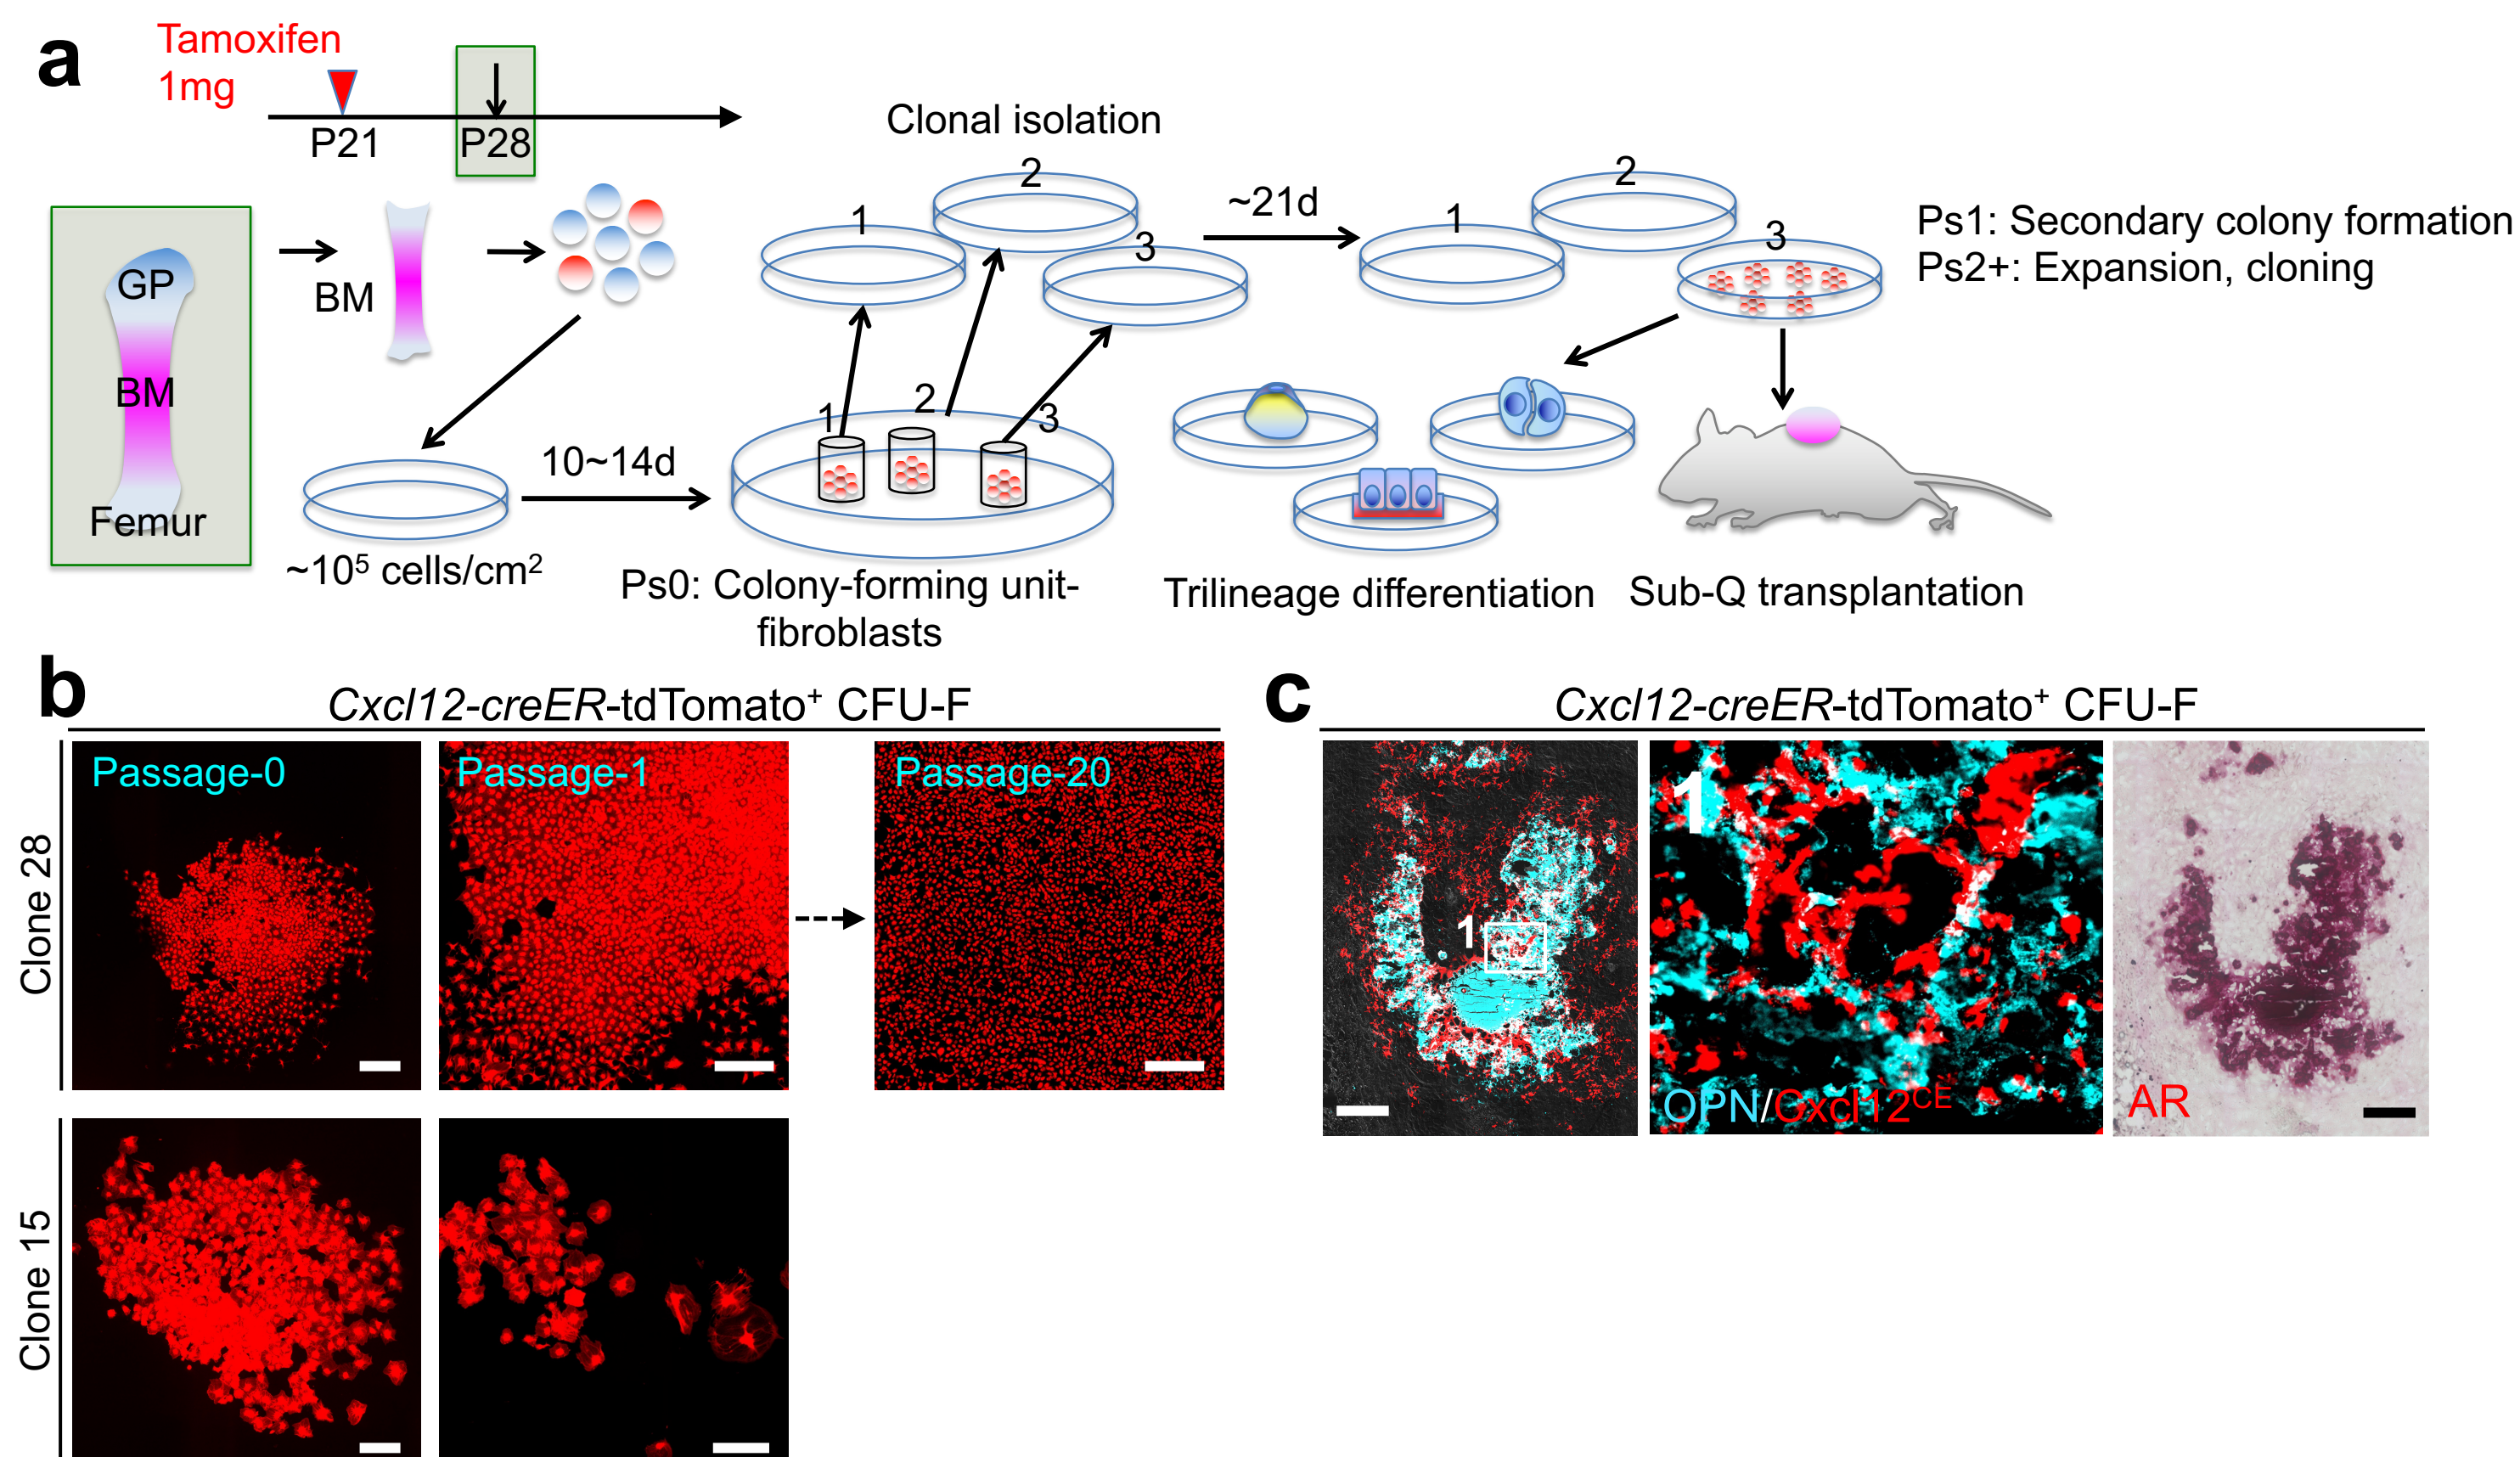

### Supplementary Figure 3. *Cxcl12-creER* marks a small subset of CFU-Fs

**(a)** *In vitro* assays on self-renewal and differentiation of individual *Cxcl12-creER*<sup>+</sup> CFU-Fs. Bone marrow cells were isolated from *Cxcl12-creER*; *R26R*<sup>tdTomato</sup> mice at P28 (pulsed at P21), and cultured at a clonal density (Ps0: Passage 0). Primary colonies were isolated individually and further cultured independently (Ps1: Passage 1). Secondary colonies were passaged further (Ps2: Passage 2 and higher) and cultured under trilineage differentiation conditions *in vitro* or subcutaneously transplanted into immunodeficient mice.

**(b)** Self-renewing (Clone 28) and non-self-renewing (Clone 15) *Cxcl12*<sup>CE</sup>-tdTomato<sup>+</sup> clones. Scale bar: 200 $\mu$ m.

**(c)** Transplantation assay of *Cxcl12*<sup>CE</sup>-tdTomato<sup>+</sup> clones into immunodeficient mice, 8 weeks after transplantation. (1): boxed area of leftmost panel. OPN: osteopontin, Light blue: OPN, red: tdTomato. Scale bar: 500 $\mu$ m.  $n=3$  mice.



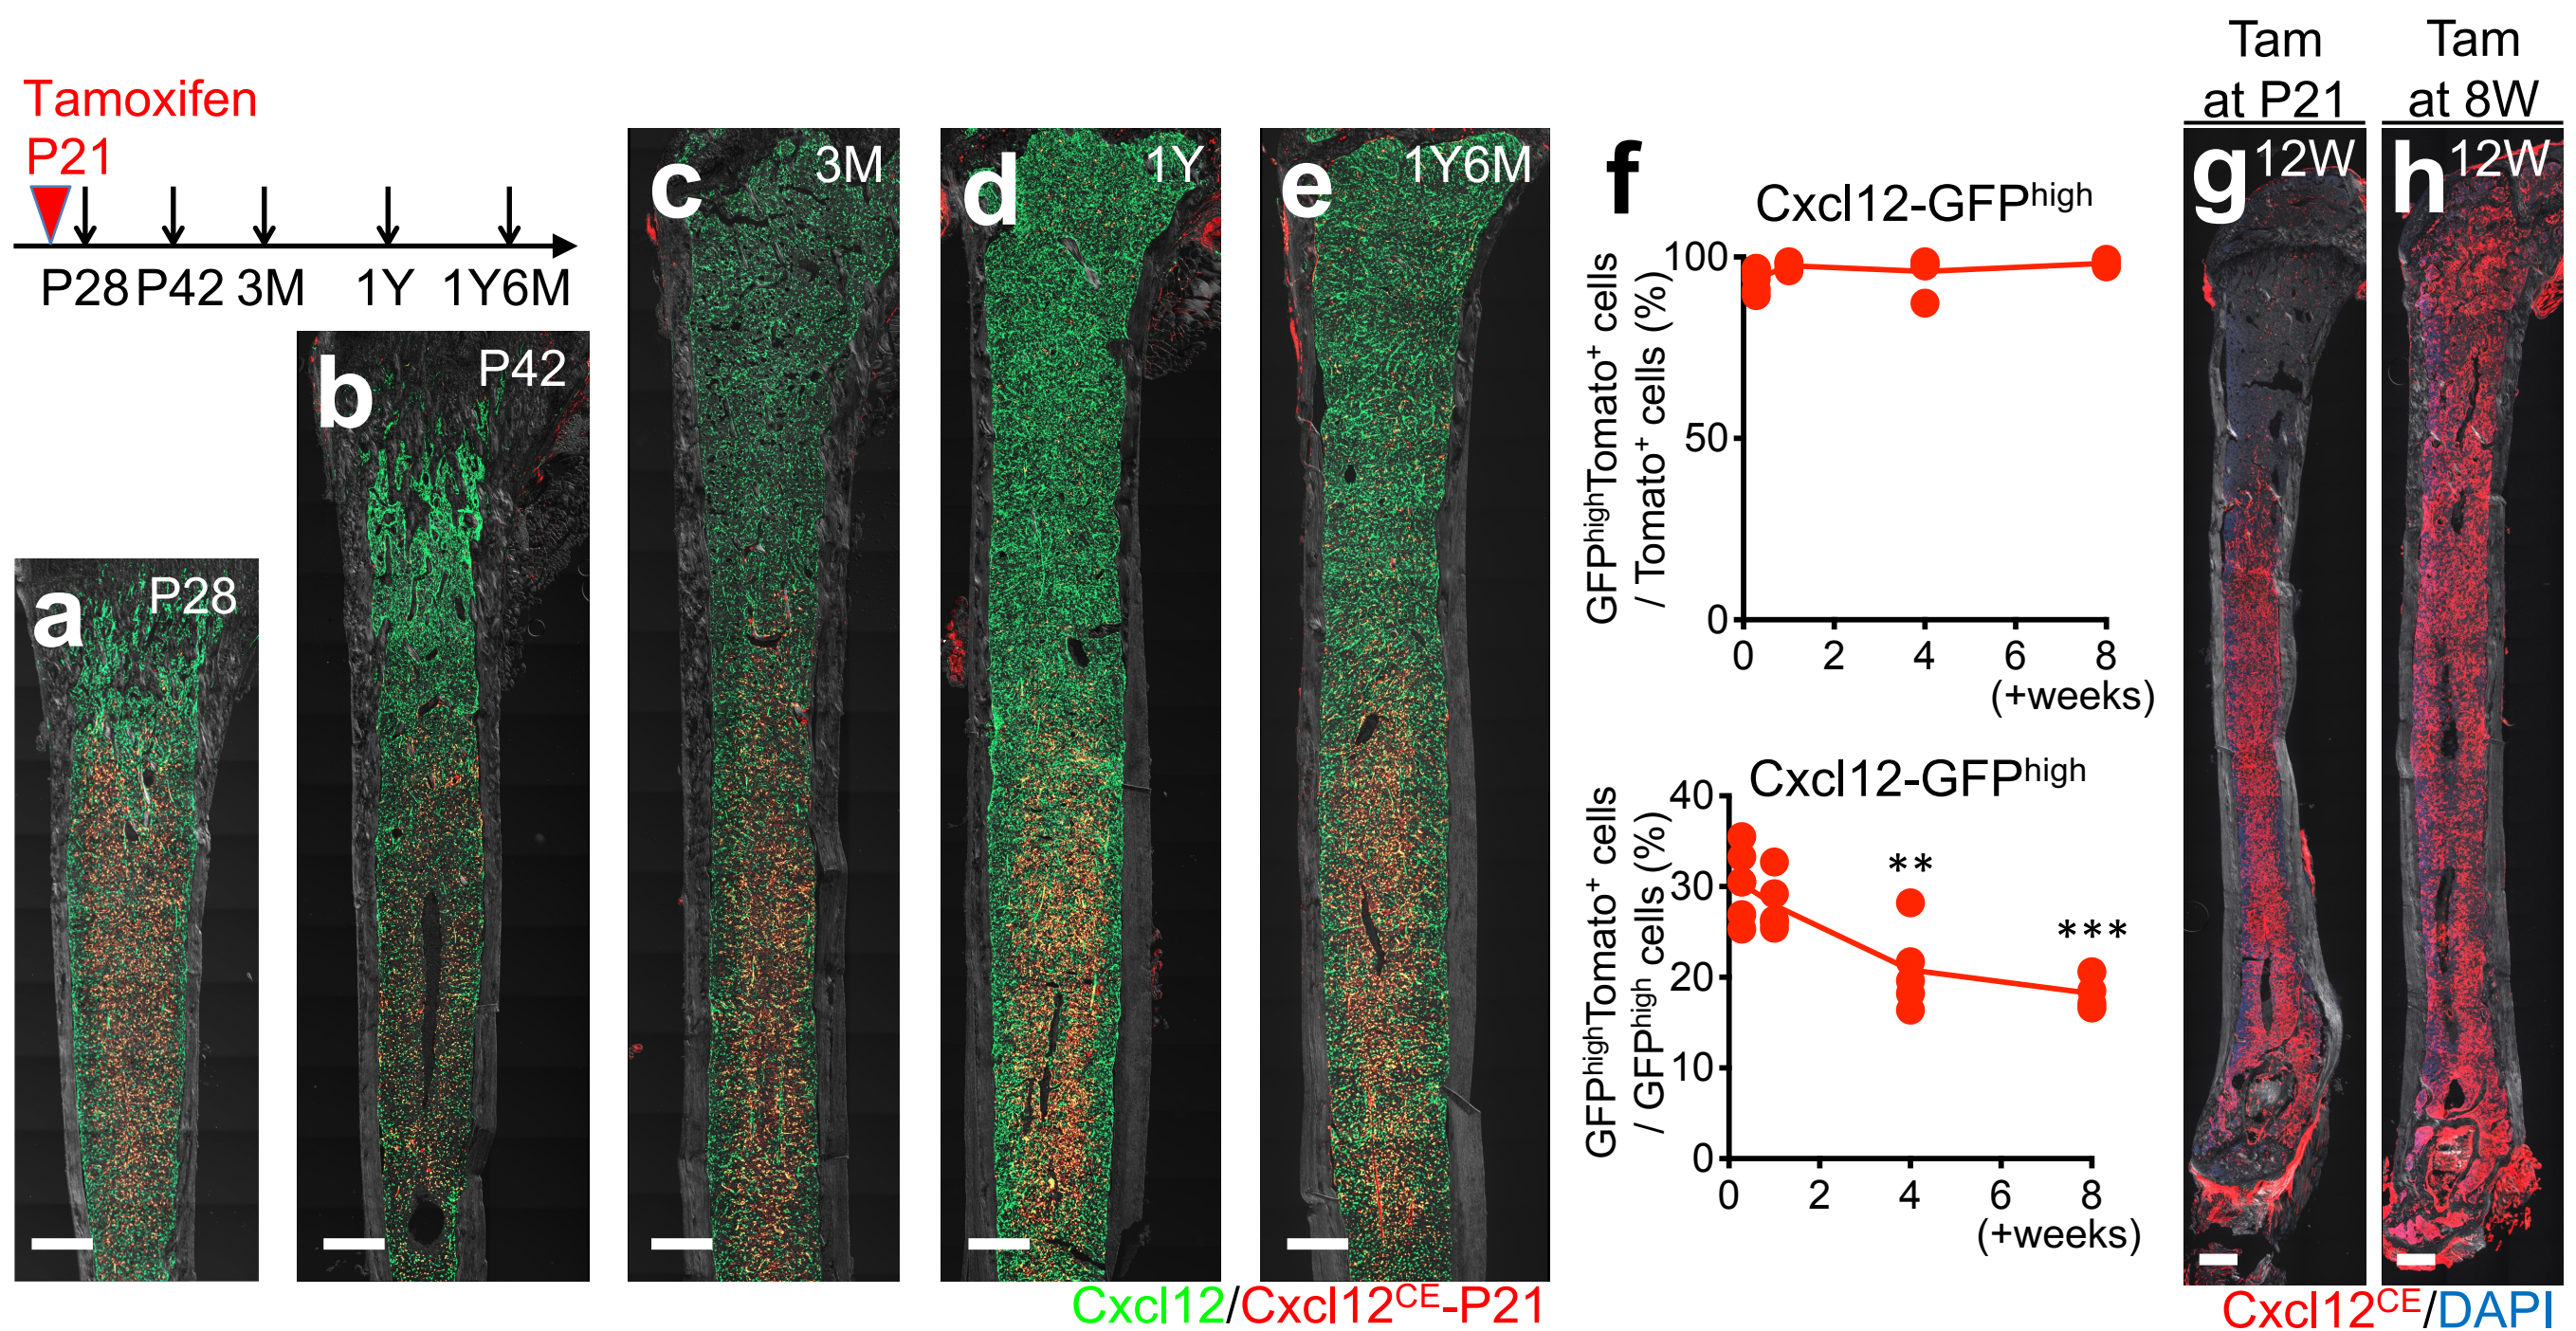

#### Supplementary Figure 4. Cell-fate analysis reveals dormancy of Cxcl12-creER<sup>+</sup> BMSCs

**(a-f)** Long-chase analysis of *Cxcl12-creER*<sup>+</sup> reticular cells pulsed at P21. *Cxcl12*<sup>GFP/+</sup>; *Cxcl12-creER*; *R26R*<sup>tdTomato</sup> distal femurs with growth plates on top. (a-e): P21-pulsed femurs analyzed at P28 (a), P42 (b), 3M (c), 1Y (d) and 1Y6M (e). Grey: DIC. Scale bar: 500 $\mu$ m.  $n=3$  mice per group. (f): Percentage of Cxcl12-GFP<sup>high</sup>tdTomato<sup>+</sup> cells per total tdTomato<sup>+</sup> (upper panel) or Cxcl12-GFP<sup>high</sup> BMSCs (lower panel) by using flow cytometry.  $n=6$  (+2 days),  $n=5$  (+1W, +4W) and  $n=4$  (+8W) mice per group. \*\*\* $p<0.001$ , \*\* $p<0.01$ , +2 days versus +4W, mean difference = 9.513, 95% confidence interval (3.355, 15.67); +2 days versus +8W, mean difference = 12.13, 95% confidence interval (5.568, 18.70). Two tailed, One-way ANOVA followed by Tukey's post-hoc test. Data are presented as mean  $\pm$  s.d. Source data are provided as a Source Data file.

**(g,h)** Whole bone images of *Cxcl12-creER*; *R26R*<sup>tdTomato</sup> femurs at 12W, pulsed at P21 (g) and at 8W (h). Grey: DIC. Scale bar: 500 $\mu$ m.



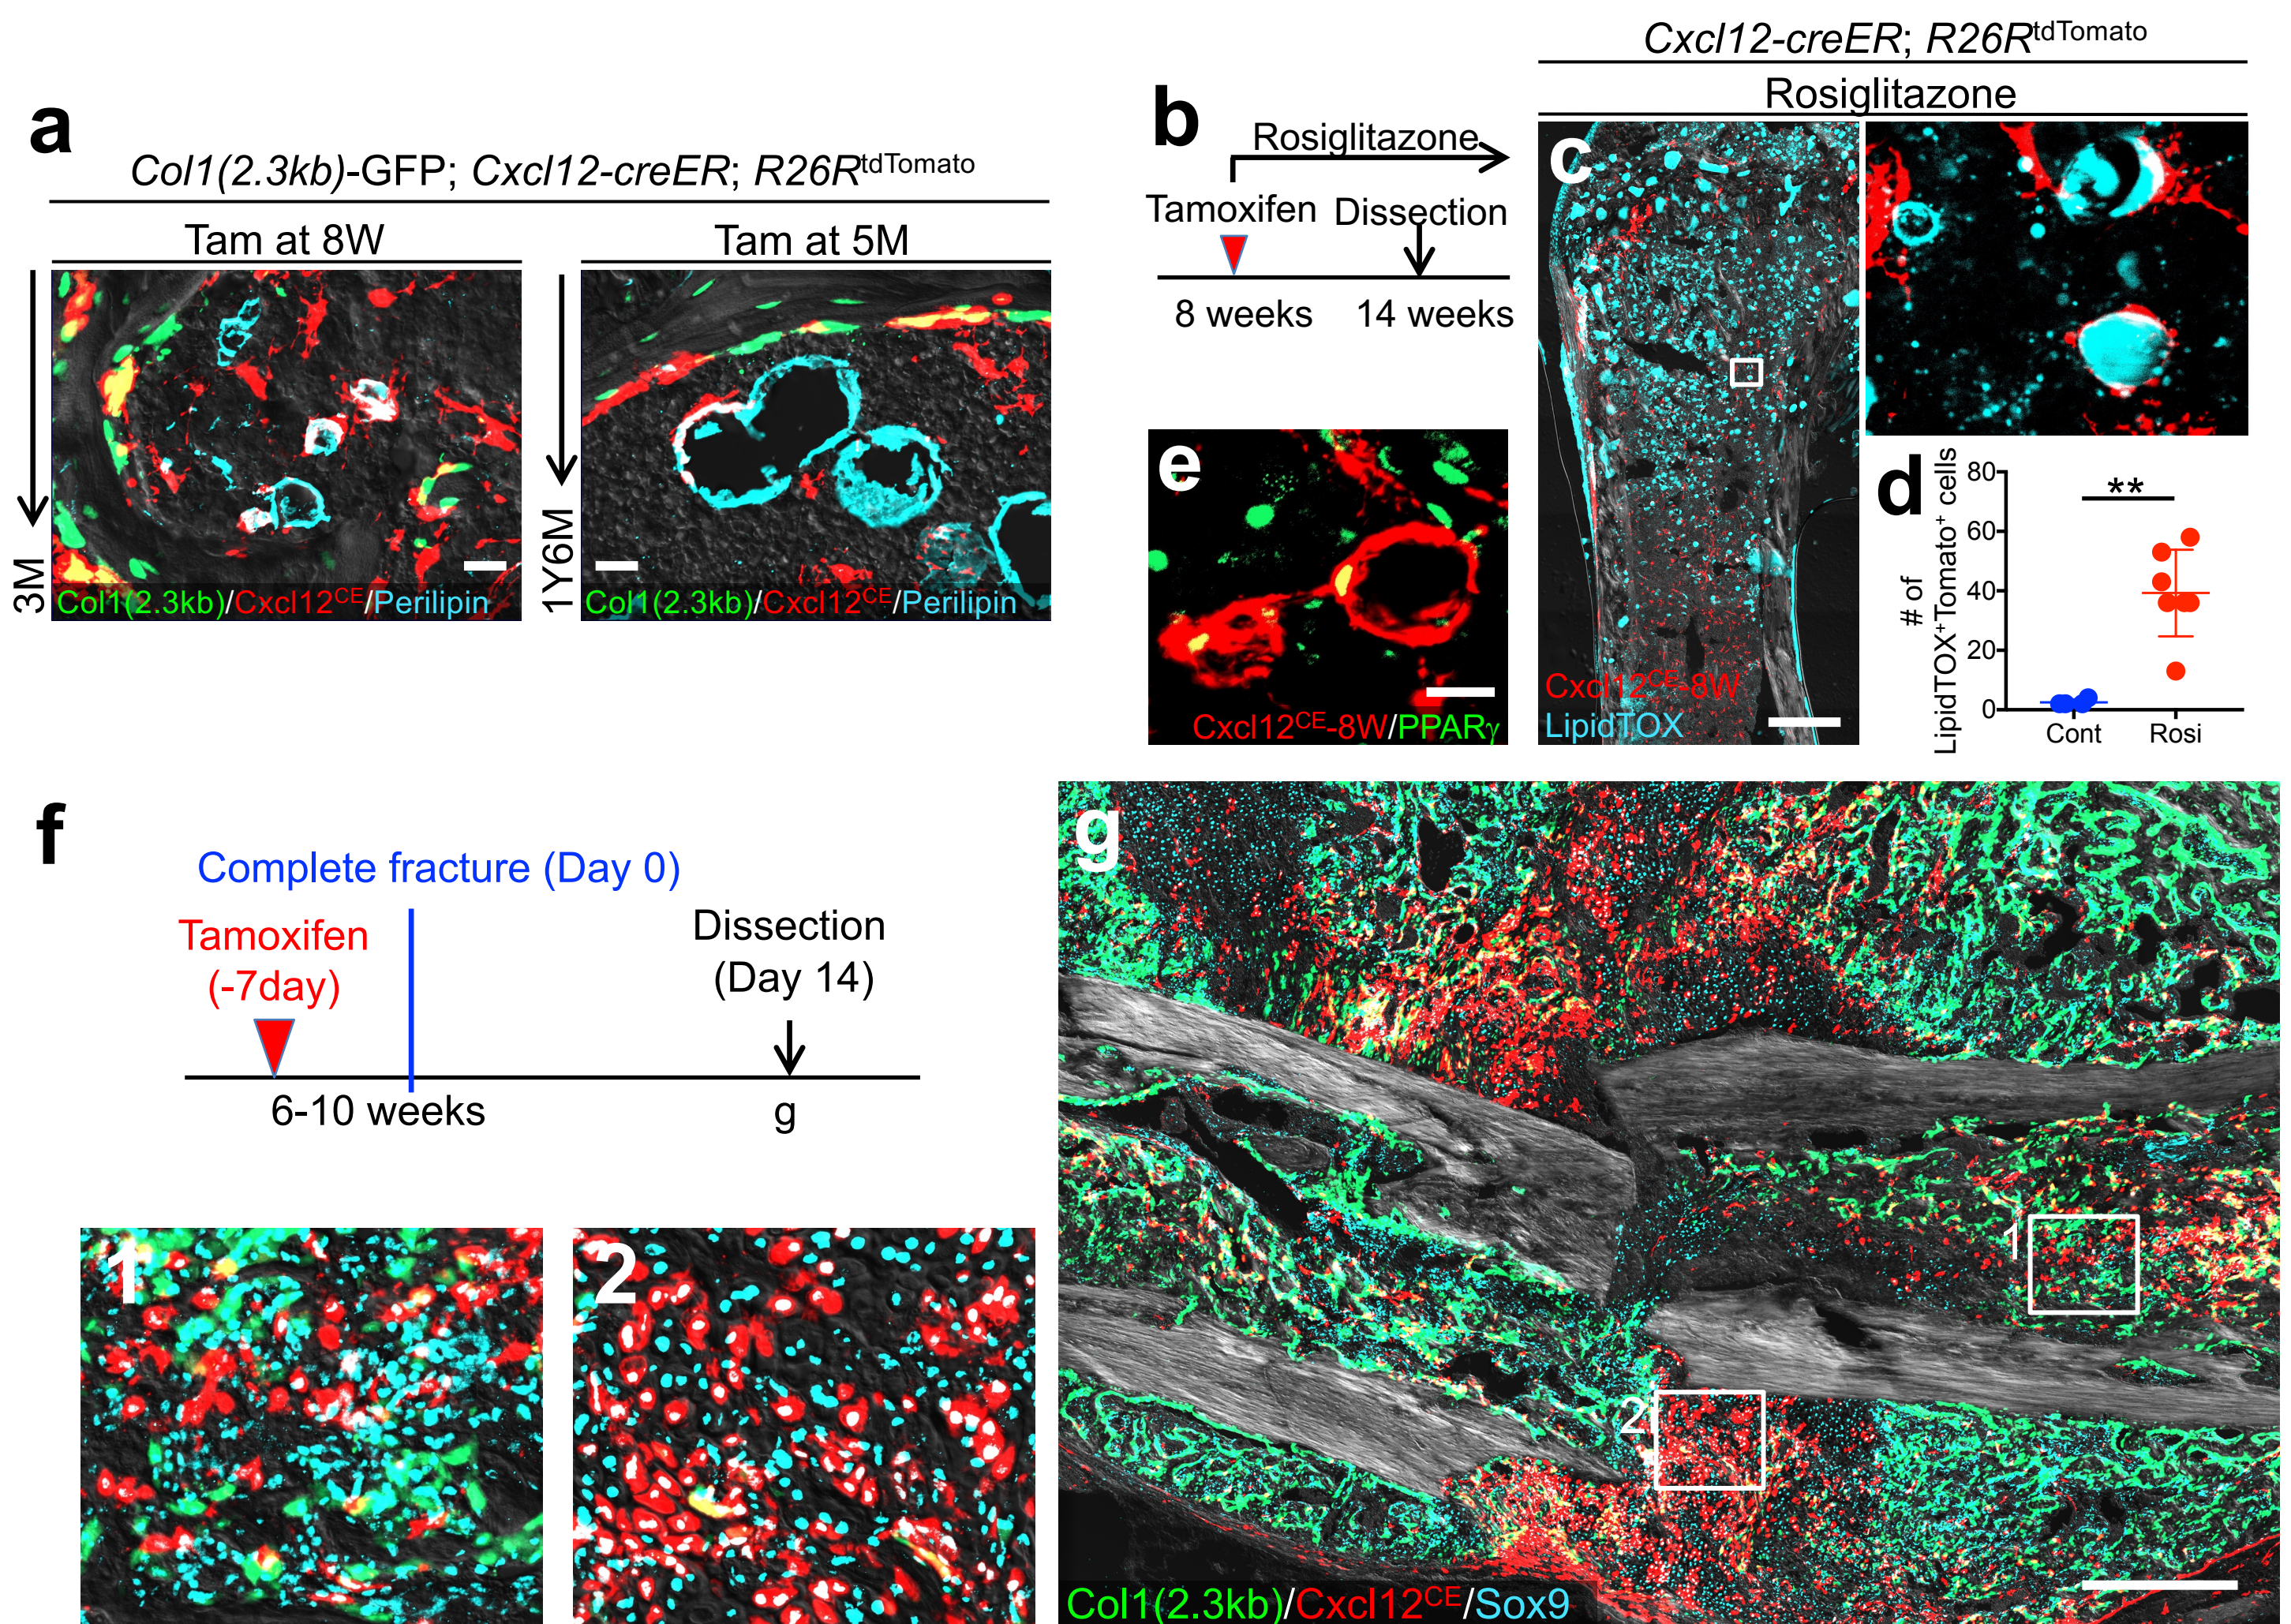

### Supplementary Figure 5. *Cxcl12-creER*<sup>+</sup> BMSCs in adipogenesis and fracture healing

**(a)** Spontaneous marrow adipogenesis at 3M and 1Y6M. *Col1(2.3kb)-GFP; Cxcl12-creER; R26R<sup>tdTomato</sup>* femurs (pulsed at 8W or 5M). Grey: DIC. Scale bar: 20 $\mu$ m.  $n=3$  mice.

**(b-e)** Inductive marrow adipogenesis using PPAR $\gamma$  agonist rosiglitazone (Rosi). **(b)**: *Cxcl12-creER; R26R<sup>tdTomato</sup>* femurs (pulsed at 8W) treated with Rosi for 6 weeks. **(c)**: LipidTOX staining. Grey: DIC. Scale bar: 500 $\mu$ m. **(d)**: Quantification of LipidTOX<sup>+</sup>tdTomato<sup>+</sup> cells, *Cxcl12-creER; R26R<sup>tdTomato</sup>* mice (pulsed at 8W) with control (Cont) or Rosi diet.  $n=4$  (Cont),  $n=7$  (Rosi) mice. \*\* $p<0.01$ , two-tailed, Mann-Whitney's  $U$ -test. Data are presented as mean  $\pm$  s.d. Source data are provided as a Source Data file. **(e)**: PPAR $\gamma$  staining. Scale bar: 20 $\mu$ m.

**(f,g)** Tibial complete fracture experiments. *Col1(2.3kb)-GFP; Cxcl12-creER; R26R<sup>tdTomato</sup>* mice received a tamoxifen pulse at 6 – 10 weeks of age, underwent surgery at 7 days after tamoxifen injection. Fourteen days after surgery. Grey: DIC. Scale bar: 500 $\mu$ m.  $n=4$  mice.



**a***Cxcl12-creER*; *R26R<sup>tdTomato</sup>*: Day 7 // BM ablation at Day 0 // tamoxifen at Day -7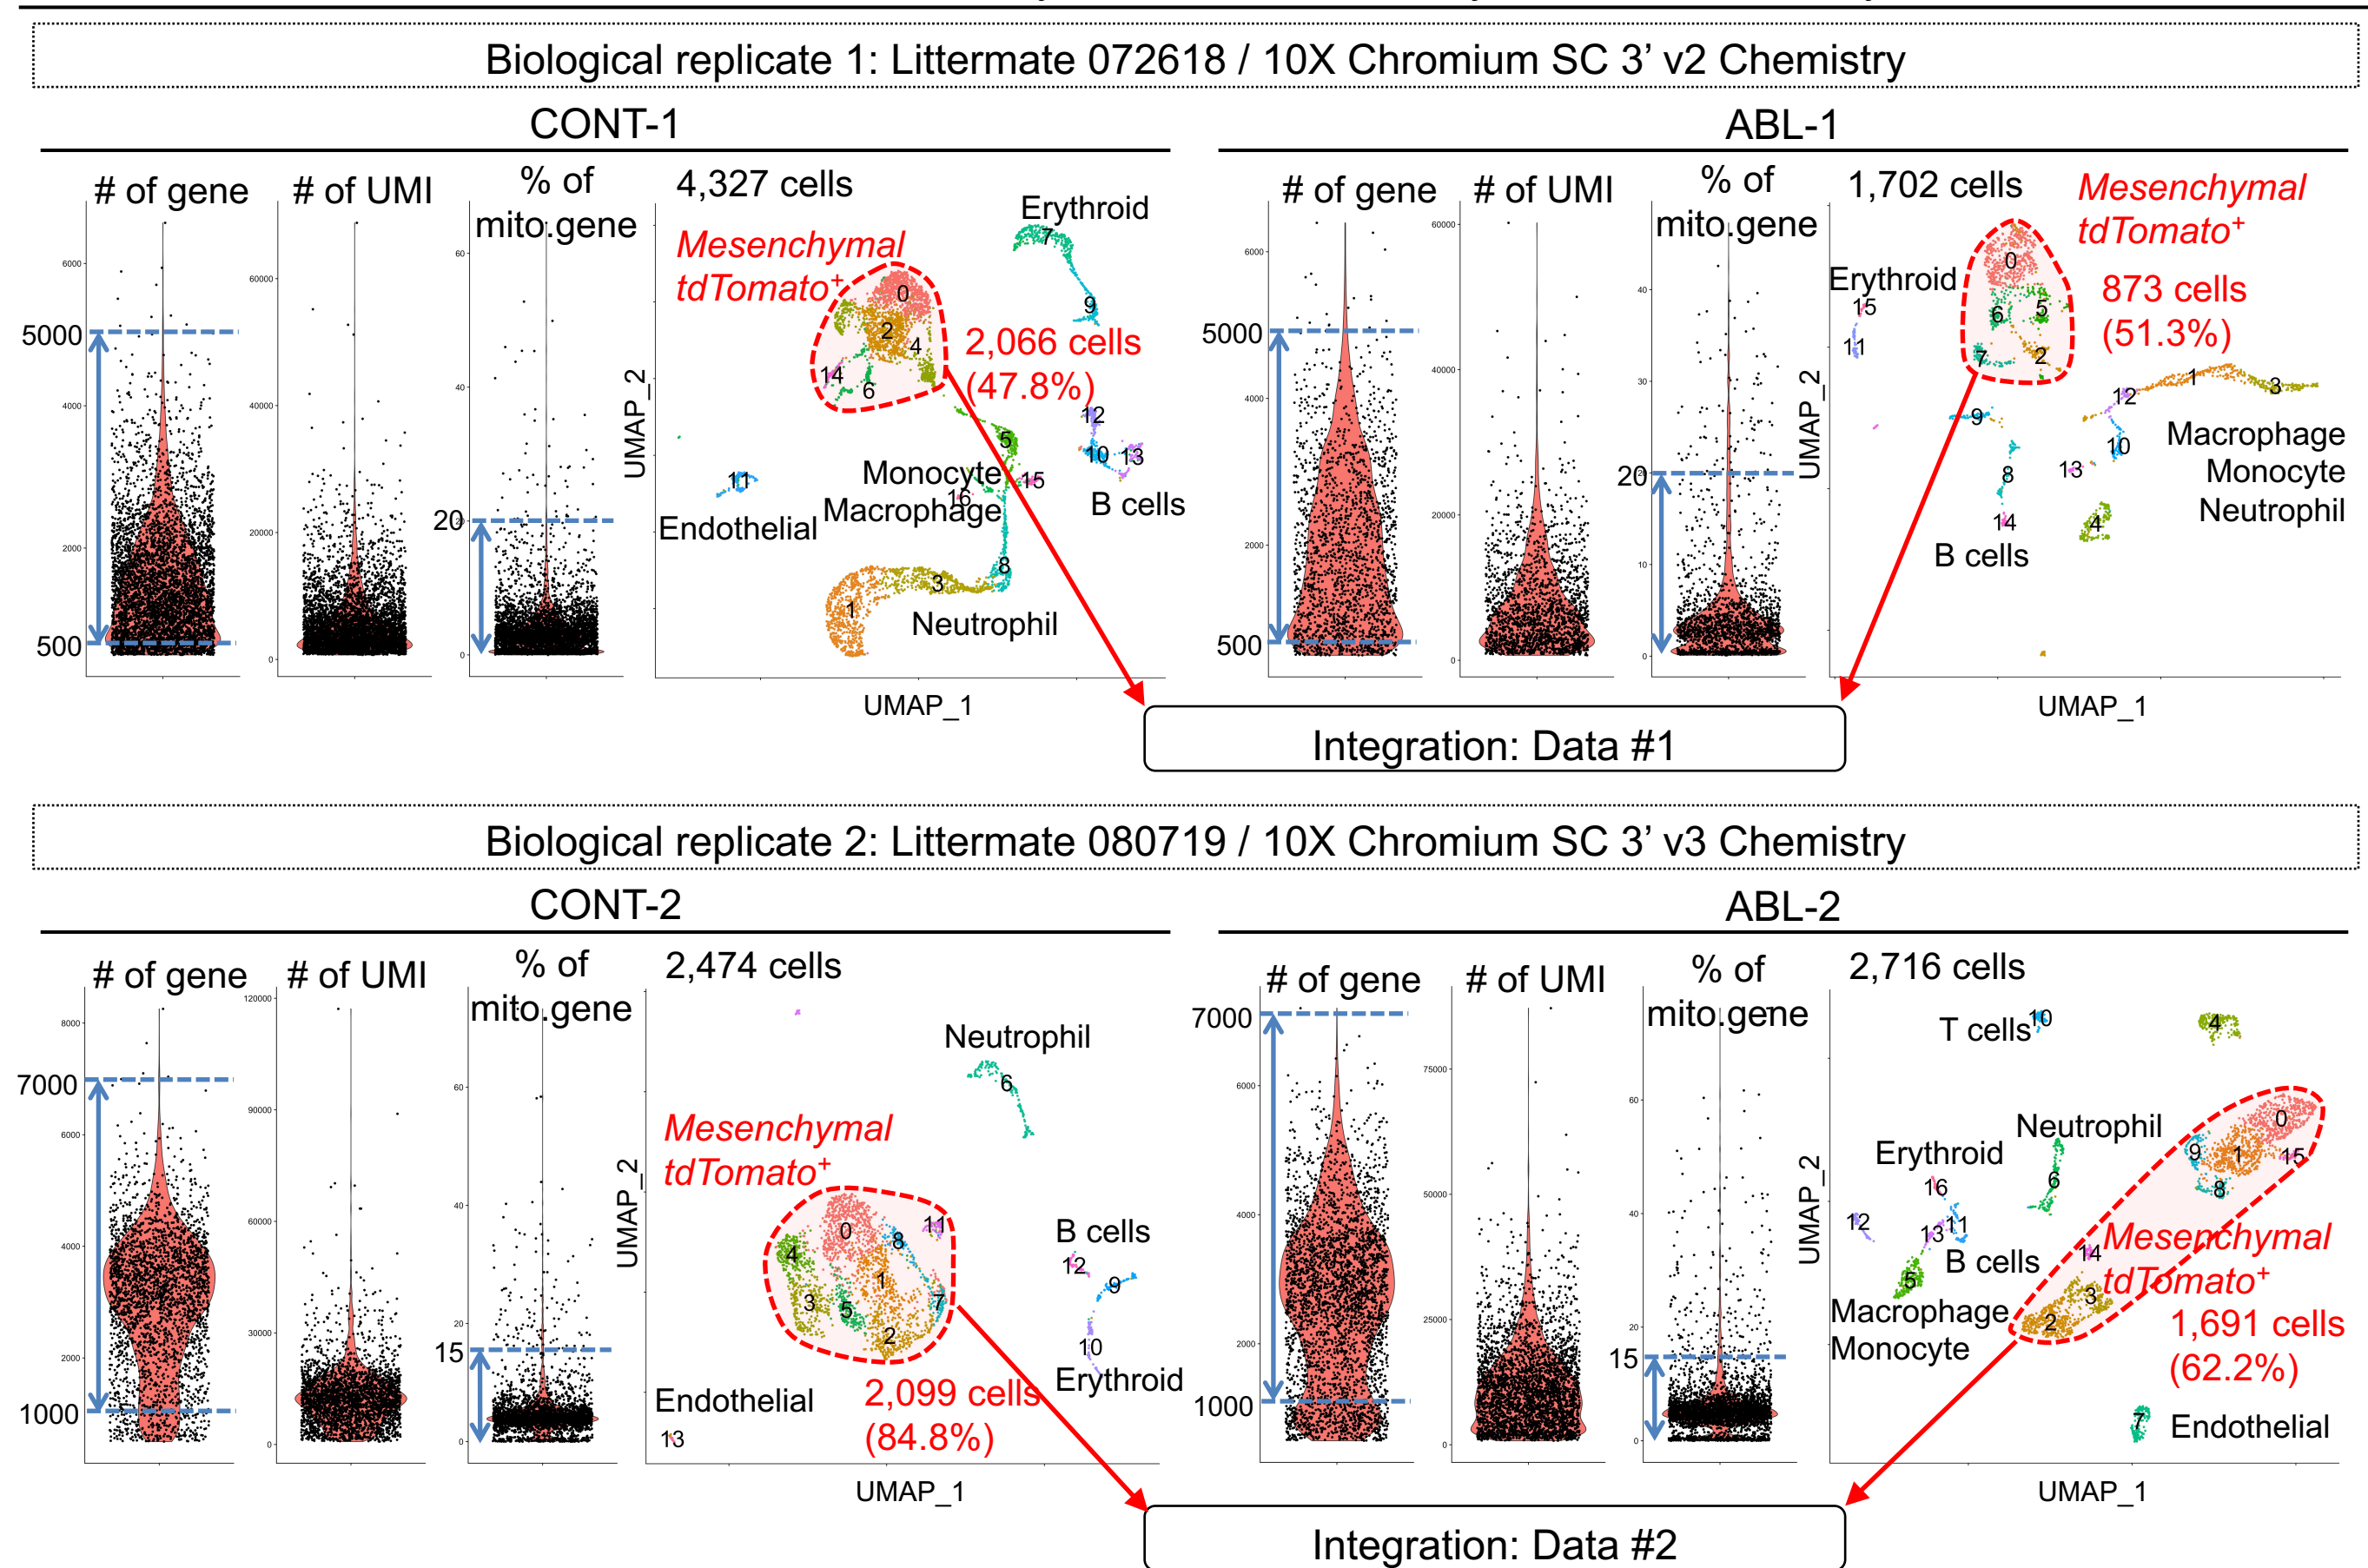**b**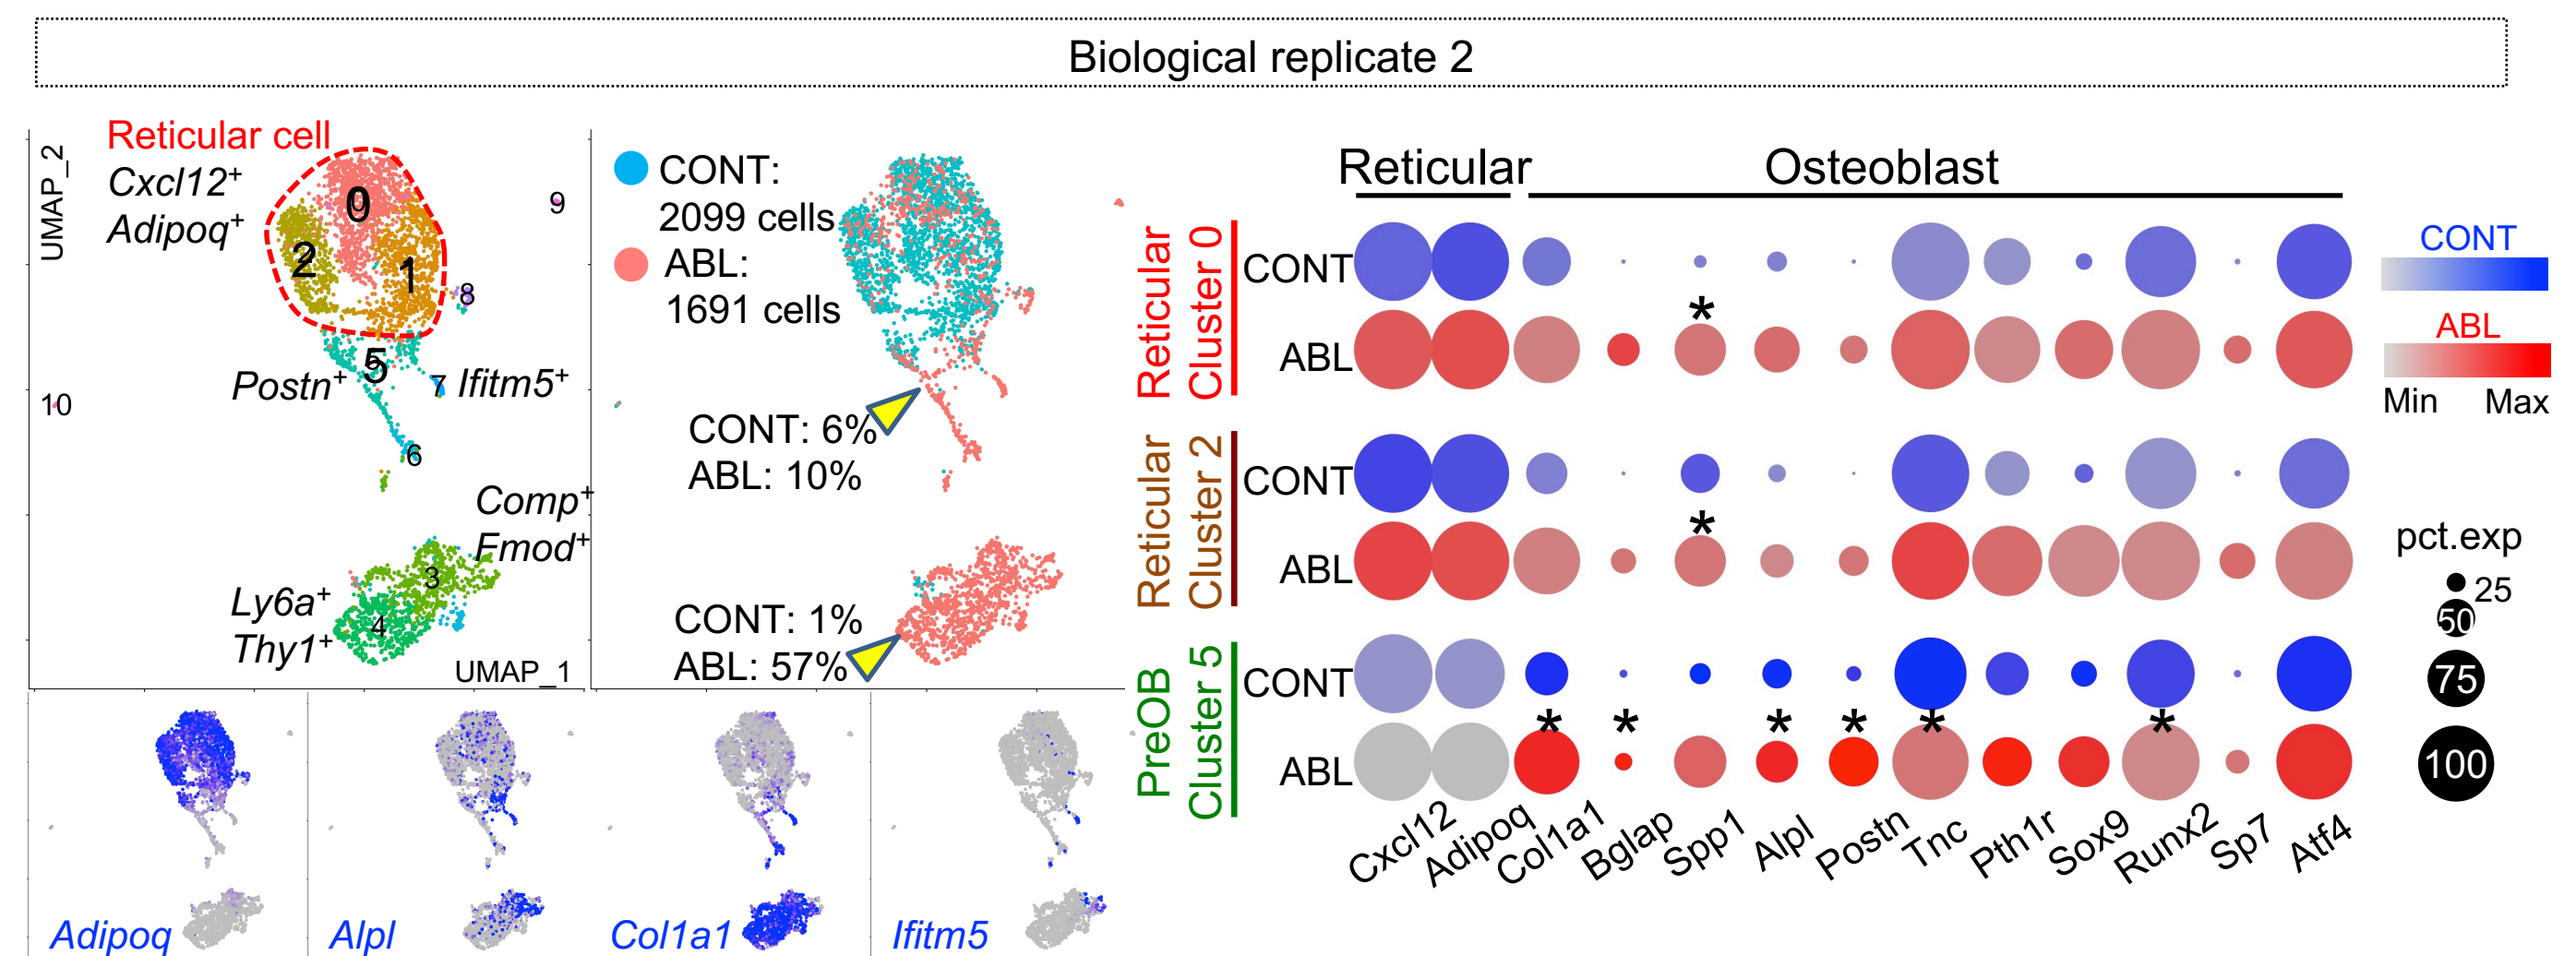**Supplementary Figure 6. Injury-induced identity conversion of *Cxcl12-creER*<sup>+</sup> BMSCs**

(a) Single cell RNA-seq analysis of fluorescently sorted single cells gated on a *tdTomato*<sup>high</sup> fraction harvested from *Cxcl12-creER*; *R26R<sup>tdTomato</sup>* contralateral (CONT) or ablated (ABL) femur bone marrow after 7 days of surgery (pulsed at 7 days before surgery). Upper panels: Biological replicate 1 (Littermate 072618, CONT-1: 4,327 cells, ABL-1: 1,702 cells), lower panels: Biological replicate 2 (Littermate 080719, CONT-2: 2,474 cells, ABL-2: 2,716 cells). Left two panels: CONT cells (CONT-1, CONT-2), right two panels: ABL cells (ABL-1, ABL-2). Each left panels: QC plots, each right panels: UMAP-based visualization of major classes of FACS-sorted cells. Red dotted contours: mesenchymal *tdTomato*<sup>+</sup> clusters. Each biological replicate pooled from *n*=7 mice.

(b) UMAP-based visualization of major classes of mesenchymal *Cxcl12<sup>CE</sup>-tdTomato<sup>+</sup>* cells (Cluster 0 – 10), Biological replicate 2. Two datasets were integrated by Seurat/CCA. Leftmost upper panel, red dotted contour: reticular (Cluster 0–2). Left lower panels: feature plots. Blue: high expression. Left center upper panel: cells colored by conditions (CONT, ABL). Biological replicate 2, *n*=3,790 cells (CONT: 2,099 cells, ABL: 1,691 cells), pooled from *n*=7 mice. (E): Split-dot-based visualization of representative gene expression. Cluster 0,2 (reticular) and Cluster 5 (pre-osteoblast) shown for reticular-signature genes (*Cxcl12*, *Adipoq*) and osteoblast-signature genes (*Col1a1*, *Bglap*, *Spp1*, *Alpl*, *Postn*, *Tnc*, *Pth1r*, *Sox9*, *Runx2*, *Sp7*, *Atf4*). \**p*<0.0001, Wilcoxon rank sum test. Circle size: percentage of cells expressing a given gene in a given cluster (0 – 100%), Color density: expression level of a given gene.



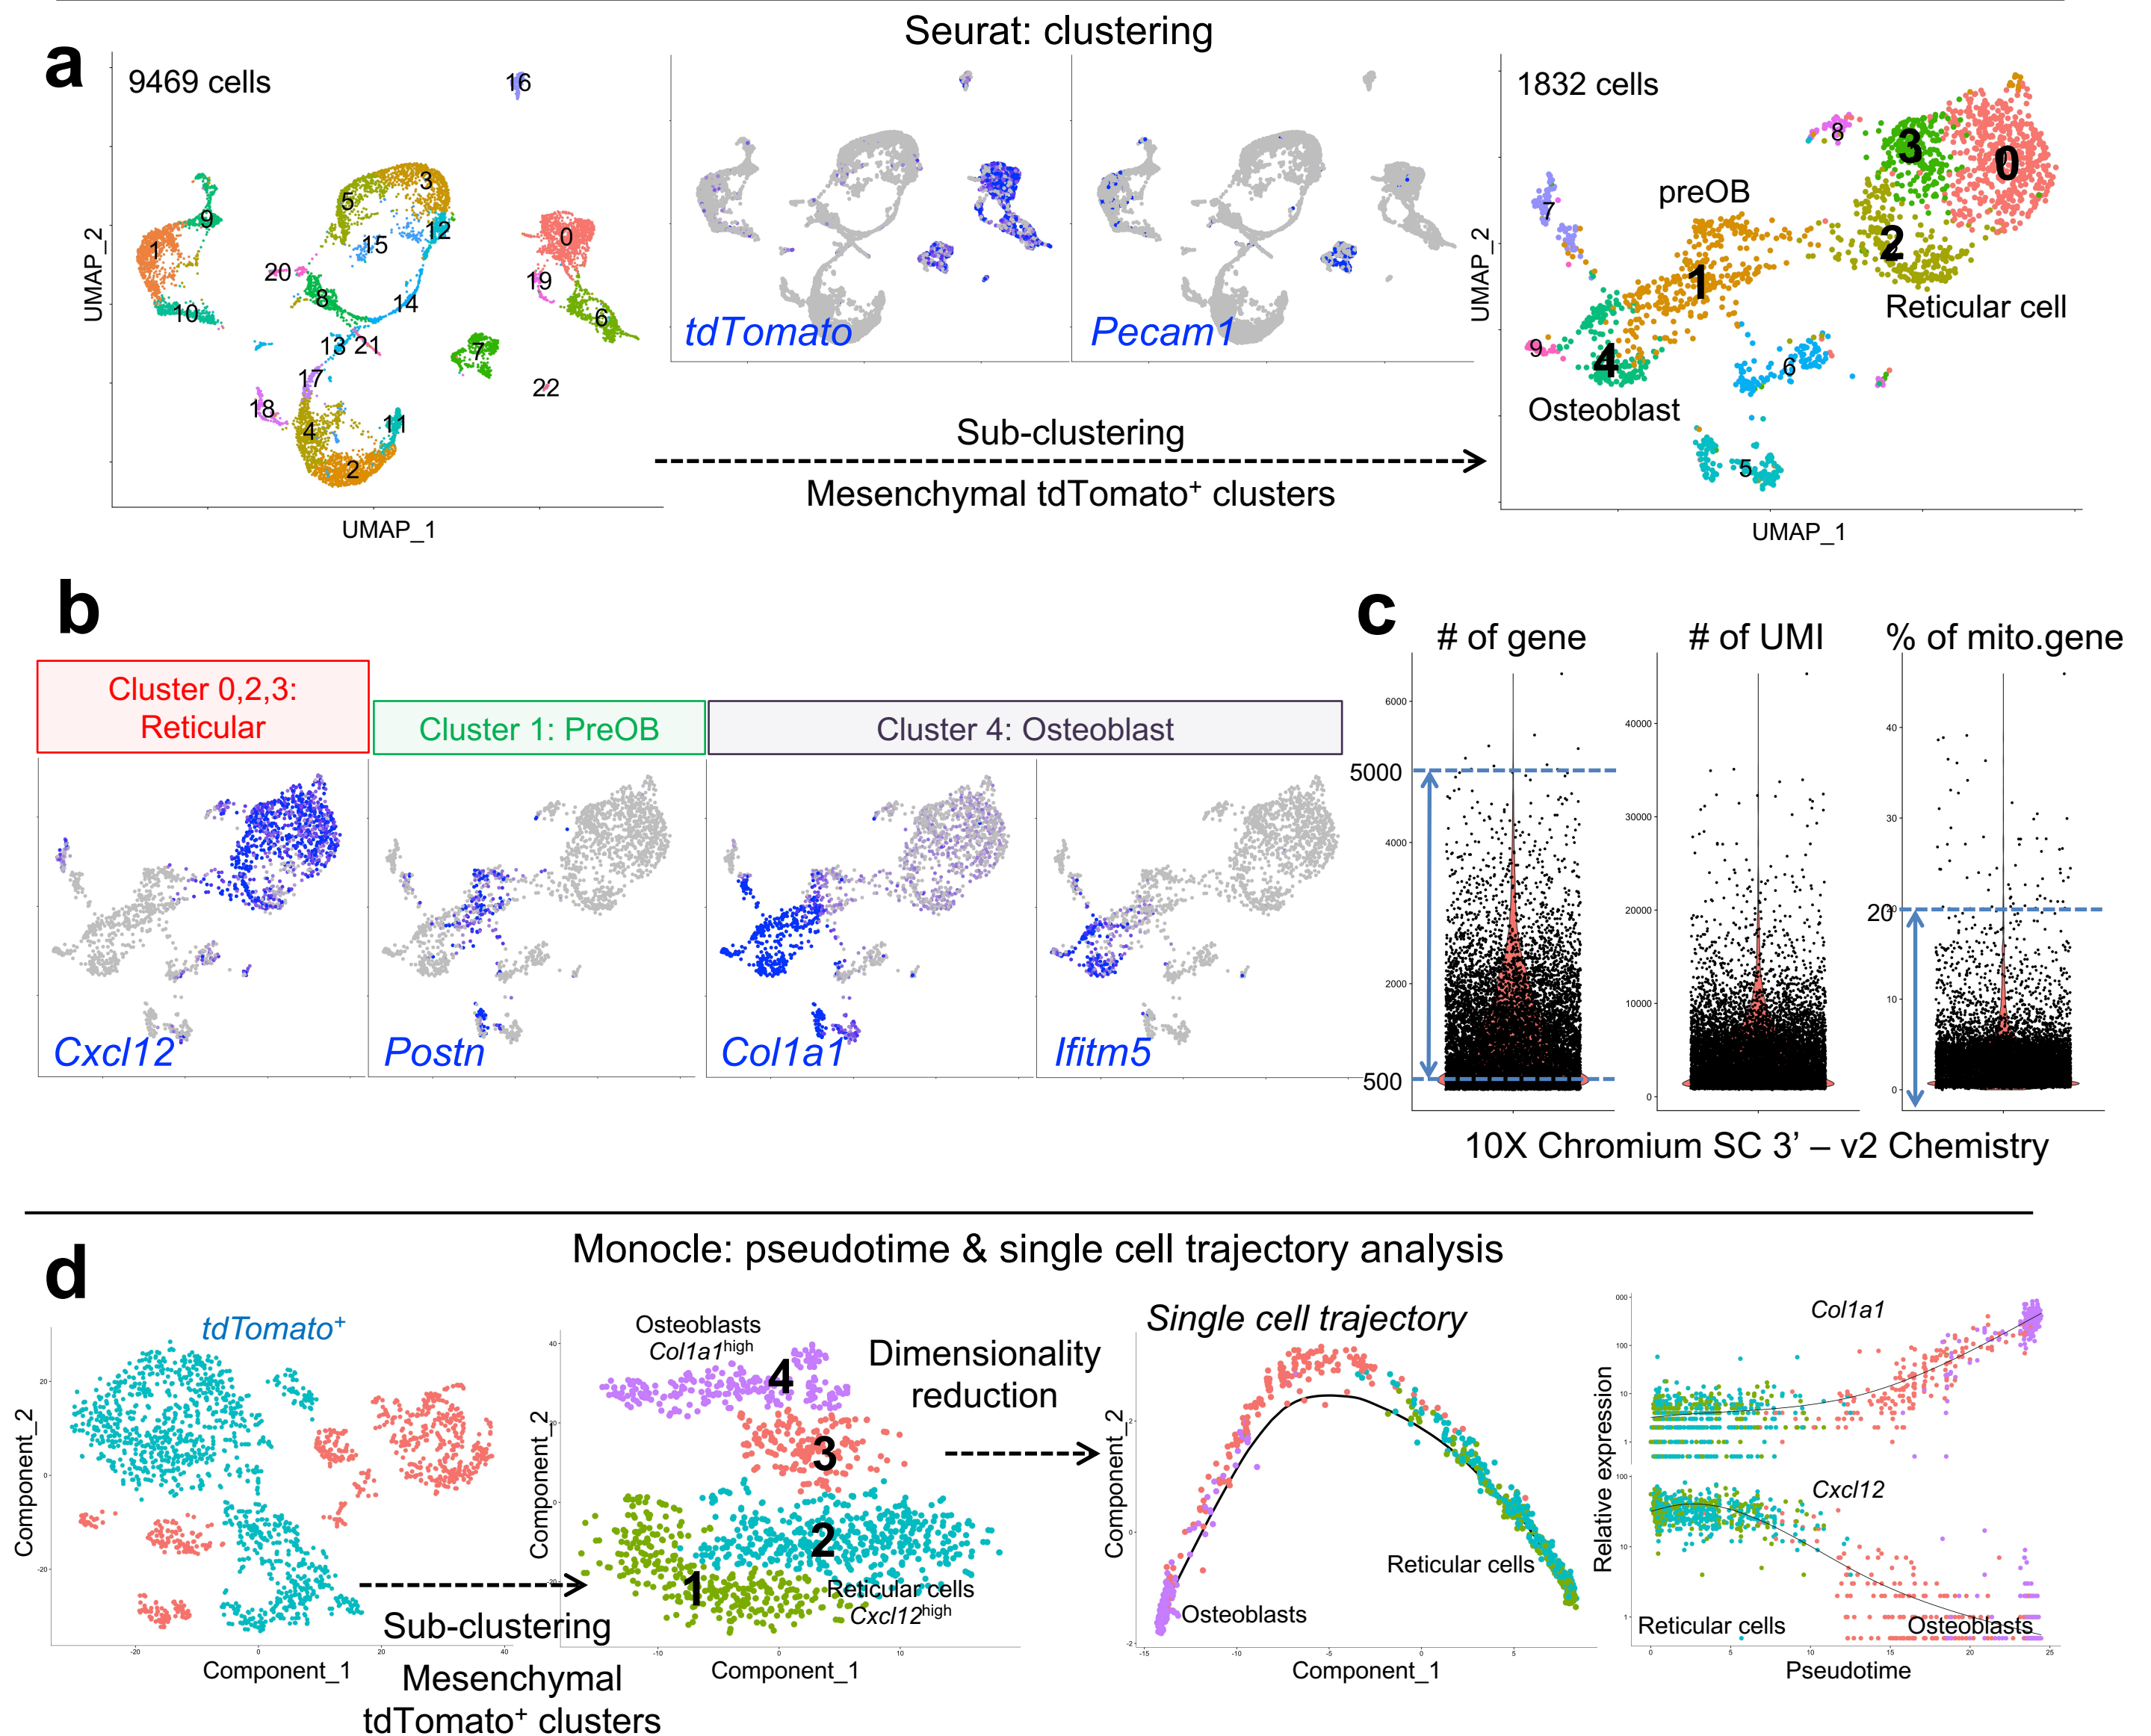

### Supplementary Figure 7. A single cell trajectory of *Cxcl12-creER*<sup>+</sup> BMSCs in regeneration

**(a,b)** Clustering analyses by Seurat. (a): UMAP-based visualization of major classes of FACS-sorted cells (left) and mesenchymal *Cxcl12*<sup>CE</sup>-tdTomato<sup>+</sup> cells (right) (Cluster 0 – 9). Cluster 0,2,3: reticular cells, Cluster 1: osteoblast precursors (preOB), Cluster 4: osteoblast. Feature plots: *tdTomato* (left) and *Pecam1* (right). (b): Feature plots of genes enriched in each cluster. *n*=1,832 cells pooled from *n*=7 mice.

**(c)** Standard QC plots. Number of genes (left) and UMIs (center) detected, percentage of mitochondrial genes (right).

**(d)** Pseudotime and single cell trajectory analysis by Monocle. Left panels: sub-clustering of mesenchymal tdTomato<sup>+</sup> cells. To isolate mesenchymal tdTomato<sup>+</sup> cells by excluding contaminating hematopoietic cells, two purification steps were performed: 1. Both *Coll1a1*<sup>+</sup> and *Cxcl12*<sup>+</sup> clusters were extracted from the original single cell dataset. 2: Only tdTomato<sup>+</sup> clusters were further extracted. The remaining mesenchymal tdTomato<sup>+</sup> clusters were further sub-clustered (Cluster 1-4) for single cell trajectory analysis. Center panel: single cell trajectories after dimensionality reduction. Right panel: pseudotime gene plots. Cluster 1,2: Reticular cells (*Cxcl12* > 30), Cluster 3: intermediate state (*Cxcl12* < 30, *Coll1a1* < 200), Cluster 4: Osteoblasts (*Coll1a1* > 200).



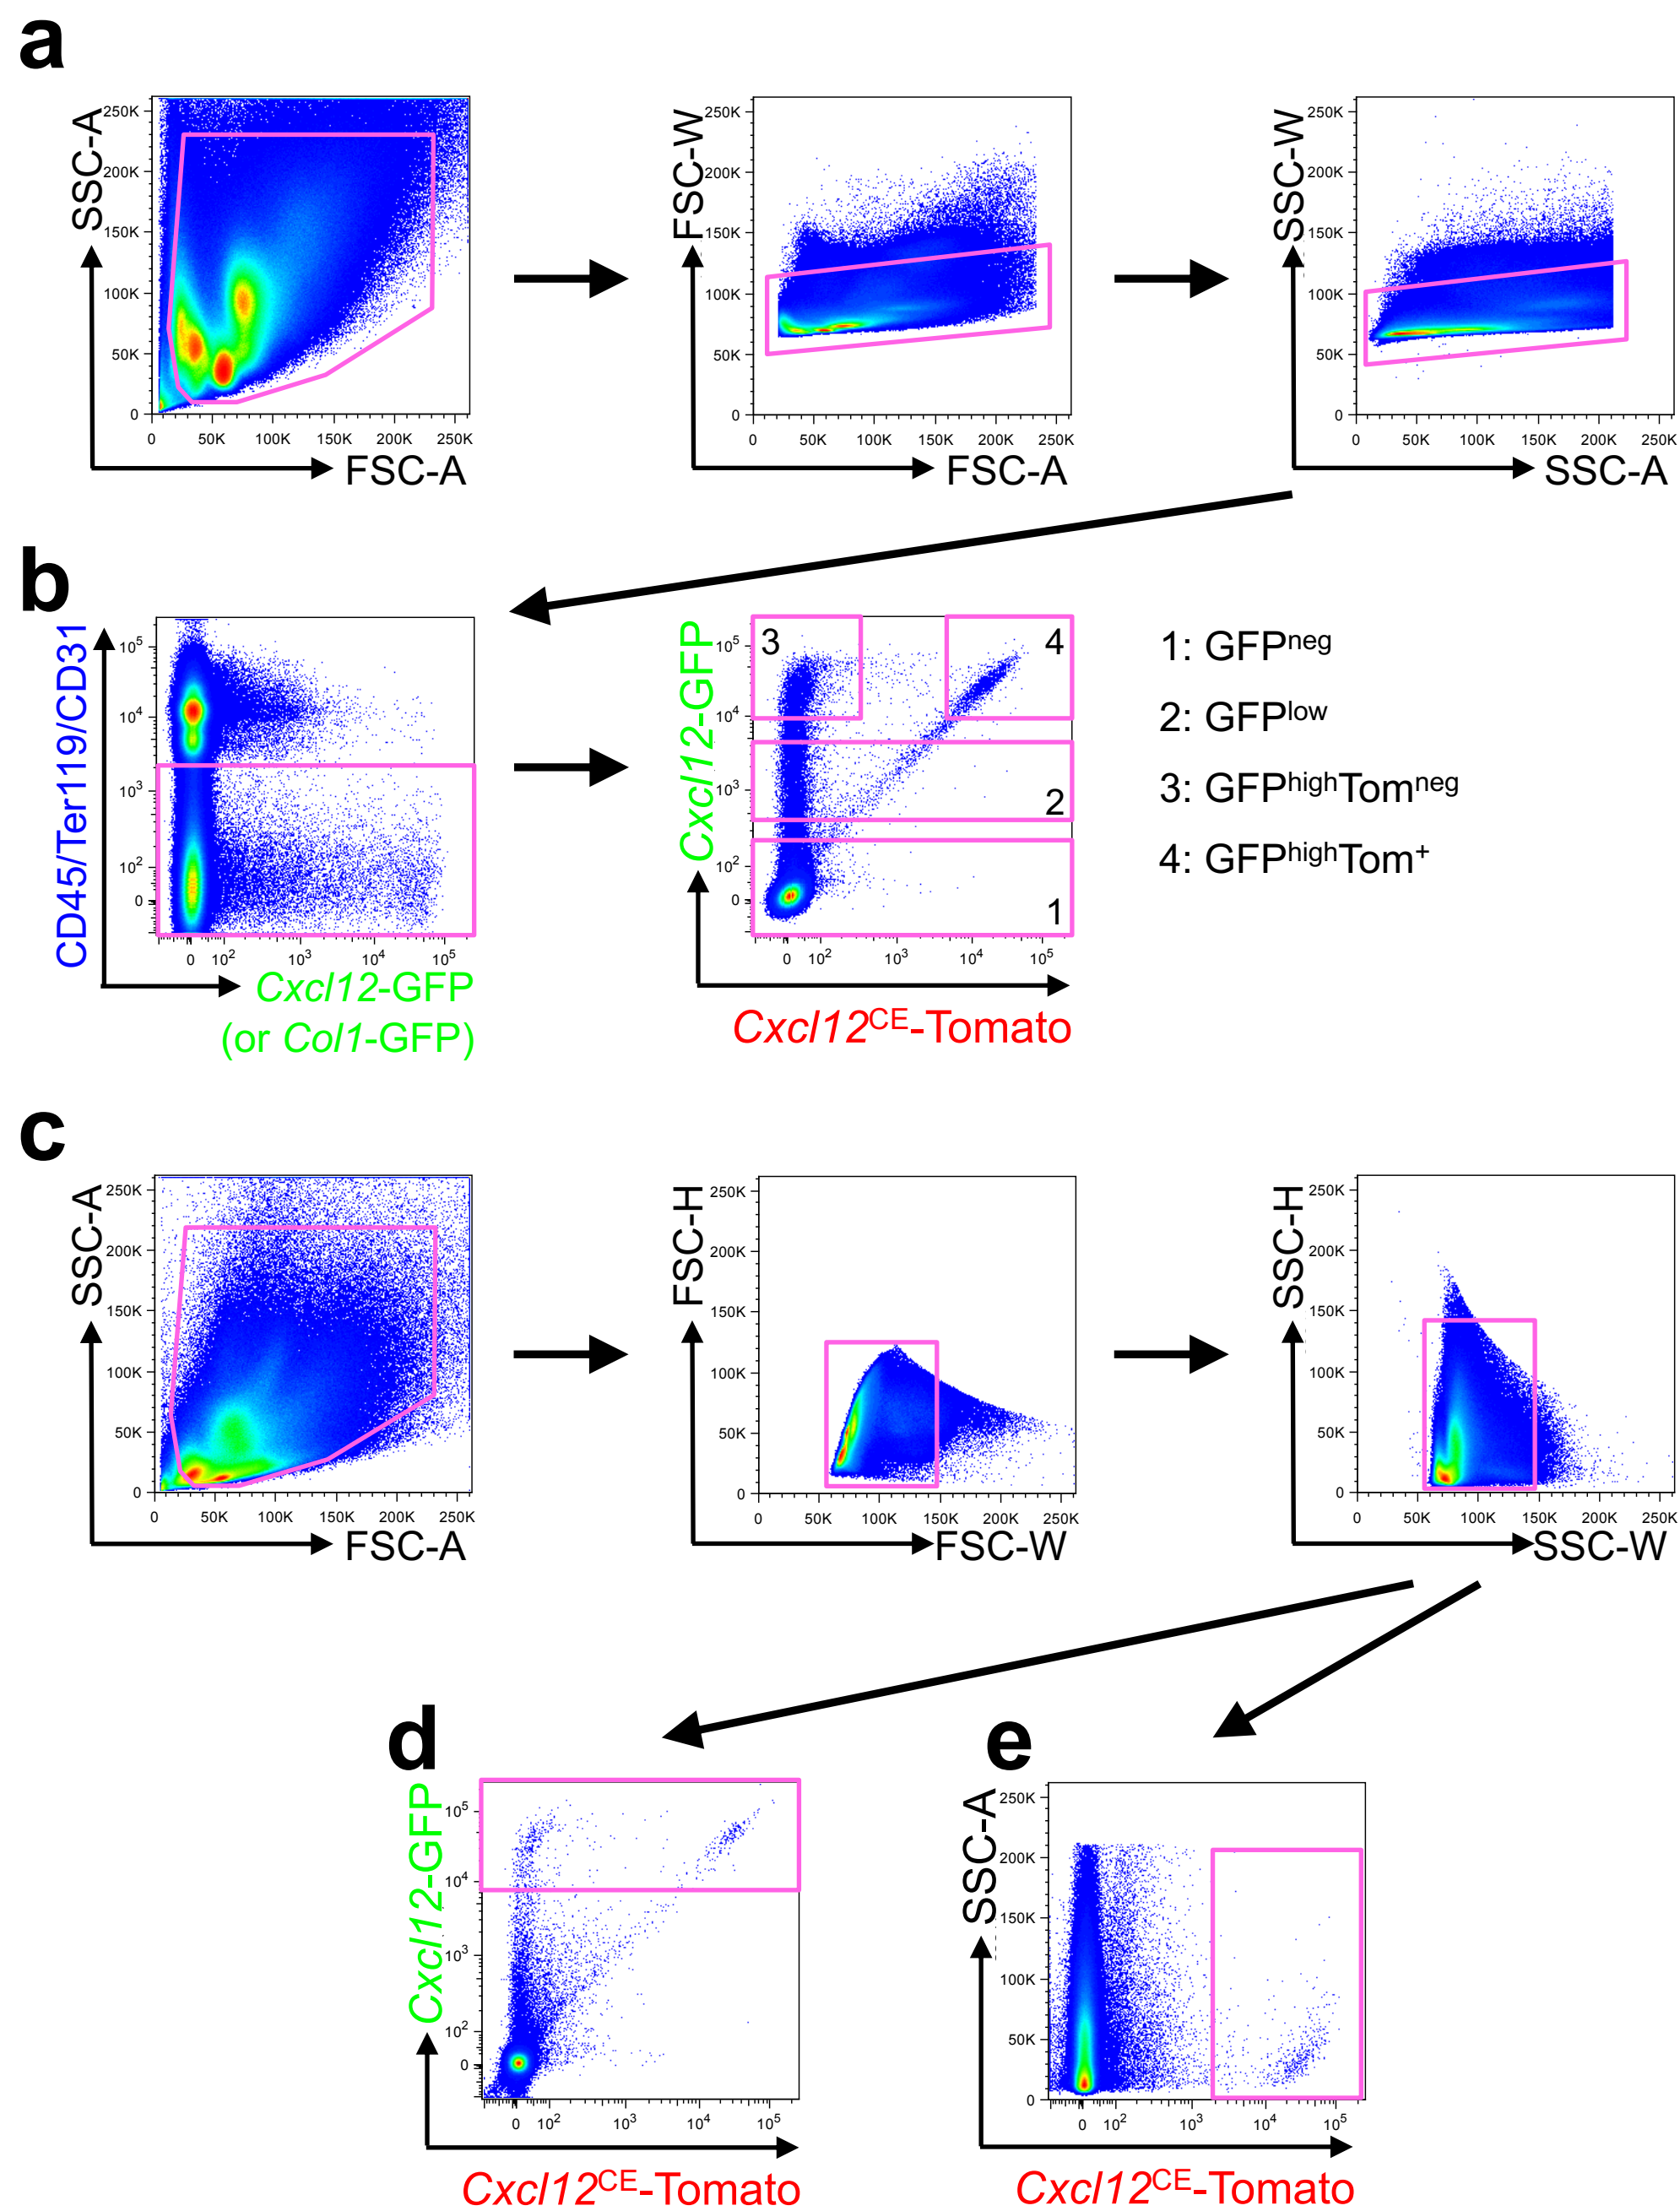

### Supplementary Figure 8. Gating strategies for flow cytometry analysis and cell sorting

**(a,b)** Flow cytometry analysis of CD45/Ter119/CD31<sup>neg</sup> cells at various time points. Gating strategy for BMSCs and osteoblasts/cytes isolated from *Cxcl12*<sup>GFP/+</sup> or *Col1(2.3kb)*-GFP; *Cxcl12-creER*; *R26R*<sup>tdTomato</sup> femurs. (Fig.1f,g, j-m,o, Fig.3h,k, Fig.5i, Fig.7a, Supplementary Fig.1b, 4f)

**(c-e)** Cell sorting strategy of *Cxcl12*-GFP<sup>+</sup>*Cxcl12-creER*<sup>+</sup> cells isolated from *Cxcl12*<sup>GFP/+</sup>; *Cxcl12-creER*; *R26R*<sup>tdTomato</sup> femurs (c,d) or *Cxcl12-creER*<sup>+</sup> cells isolated from *Cxcl12-creER*; *R26R*<sup>tdTomato</sup> femurs for single cell RNA-seq analysis (c,e). (Fig.2a, Fig.6a, Fig.7d)
